# Supplementary material for: Levels of Circulating IgM and IgY Natural Antibodies in Broiler Chicks: Association with Genotype and Farming Systems
Source: MDPI journal article supplement (doi:10.3390/biology12020304), 2023-02-14
Supplement: s1 [file s1]

| Regression type: Least squares  |                      |                         |                                      |                     |          |         |                 |  |  |  |              |           |                      |                     |          |         |                 |            |         |                                      |              |           |                     |                     |          |         |                 |          |                     |                      |              |        |    |  |  |  |  |  |  |  |
|---------------------------------|----------------------|-------------------------|--------------------------------------|---------------------|----------|---------|-----------------|--|--|--|--------------|-----------|----------------------|---------------------|----------|---------|-----------------|------------|---------|--------------------------------------|--------------|-----------|---------------------|---------------------|----------|---------|-----------------|----------|---------------------|----------------------|--------------|--------|----|--|--|--|--|--|--|--|
| Dependent variable              | IgM anti-ACT         |                         |                                      |                     |          |         |                 |  |  |  | IgM anti-DNA |           |                      |                     |          |         |                 |            |         |                                      | IgM anti-TNP |           |                     |                     |          |         |                 |          |                     |                      | IgM anti-LPS |        |    |  |  |  |  |  |  |  |
| Analysis of Variance            | SS                   | DF                      | MS                                   | F (DFn, DFd)        | P value  |         |                 |  |  |  | SS           | DF        | MS                   | F (DFn, DFd)        | P value  |         |                 |            |         |                                      | SS           | DF        | MS                  | F (DFn, DFd)        | P value  |         |                 |          |                     |                      |              |        |    |  |  |  |  |  |  |  |
| Regression                      | 6.488                | 12                      | 0.5407                               | F (12, 28) = 2.497  | P=0.0226 |         |                 |  |  |  | 5.582        | 12        | 0.4652               | F (12, 28) = 2.388  | P=0.0283 |         |                 |            |         |                                      | 8.957        | 12        | 0.7464              | F (12, 28) = 2.145  | P=0.0472 |         |                 |          |                     |                      |              |        |    |  |  |  |  |  |  |  |
| Residual                        | 6.062                | 28                      | 0.2165                               |                     |          |         |                 |  |  |  |              |           |                      | 5.756               | 28       | 0.2057  |                 |            |         |                                      |              | 6.319     | 28                  | 0.2255              |          |         |                 |          |                     |                      |              |        |    |  |  |  |  |  |  |  |
| Total                           | 12.55                | 40                      | 0.3136                               |                     |          |         |                 |  |  |  |              |           |                      | 11.34               | 40       | 0.2844  |                 |            |         |                                      |              | 16.22     | 40                  | 0.4055              |          |         |                 |          |                     |                      |              |        |    |  |  |  |  |  |  |  |
| Parameter estimates             | Variable             | Estimate                | Standard error                       | 95% CI (asymptotic) | t        | P value | P value summary |  |  |  |              | Estimate  | Standard error       | 95% CI (asymptotic) | t        | P value | P value summary |            |         |                                      |              | Estimate  | Standard error      | 95% CI (asymptotic) | t        | P value | P value summary |          |                     |                      |              |        |    |  |  |  |  |  |  |  |
| [0]                             | Intercept            | -0.4245                 | 3.747                                | -10.100 to 7.251    | 0.1133   | 0.9106  | ns              |  |  |  |              | 2.308     | 3.554                | -4.972 to 9.589     | 0.6485   | 0.5213  | ns              |            |         |                                      |              | -0.3746   | 3.664               | -7.880 to 7.131     | 0.1022   | 0.9193  | ns              | -8.562   | 3.824               | -16.41 to -0.7490    | 2.244        | 0.0329 | ** |  |  |  |  |  |  |  |
|                                 | Season(3)            | 3.187                   | 0.948                                | -0.948 to 13.32     | 0.6442   | 0.5247  | ns              |  |  |  |              | 1.553     | 0.693                | -0.800 to 11.17     | 0.3309   | 0.7432  | ns              |            |         |                                      |              | 3.308     | 0.838               | -0.902 to 12.52     | 0.6218   | 0.5591  | ns              | 3.725    | 0.549               | -3.018 to 17.87      | 1.451        | 0.158  | ns |  |  |  |  |  |  |  |
|                                 | Season(1)            | -1.615                  | 0.527                                | -21.13 to 17.90     | 0.1695   | 0.8666  | ns              |  |  |  |              | -27.81    | 13.307               | -57.33 to 2.707     | 1.03     | 0.312   | ns              |            |         |                                      |              | 3.303     | 0.937               | -32.01 to 41.153    | 1.388    | 0.1761  | ns              | -32.41   | 9.718               | -51.86 to -12.95     | 1.285        | 0.2002 | ns |  |  |  |  |  |  |  |
|                                 | Season(2)            | 1.876                   | 0.583                                | -0.047 to 16.105    | 0.9271   | 0.3618  | ns              |  |  |  |              | 0.2907    | 0.1064               | -0.199 to 10.787    | 0.0682   | 0.851   | ns              |            |         |                                      |              | 4.6       | 0.573               | -6.202 to 15.40     | 0.8723   | 0.3962  | ns              | 12.89    | 0.504               | 1.618 to 24.17       | 2.342        | 0.0285 | ** |  |  |  |  |  |  |  |
|                                 | Breed(1)             | -1.689                  | 3.47                                 | -8.789 to 5.420     | 0.4867   | 0.6303  | ns              |  |  |  |              | -2.775    | 3.262                | -9.517 to 3.368     | 0.8429   | 0.4084  | ns              |            |         |                                      |              | 0.07704   | 3.393               | -6.874 to 7.028     | 0.0227   | 0.982   | ns              | 8.833    | 3.542               | -0.8518 to 13.46     | 1.808        | 0.0814 | ns |  |  |  |  |  |  |  |
|                                 | EPEF                 | 0.03384                 | 0.01217                              | -0.02109 to 0.03878 | 0.3158   | 0.7545  | ns              |  |  |  |              | -0.03082  | 0.01105              | -0.02761 to 0.01989 | 0.3432   | 0.734   | ns              |            |         |                                      |              | 0.00981   | 0.02885             | -0.01991 to 0.02885 | 0.3795   | 0.7101  | ns              | 0.00448  | 0.02635             | -0.0248              | 0.0191       | ns     |    |  |  |  |  |  |  |  |
|                                 | Season(3)   Breed(1) | -1.876                  | 0.732                                | -7.473 to 3.720     | 0.6867   | 0.4933  | ns              |  |  |  |              | -5.847    | 4.673                | -15.046 to 3.352    | 0.2465   | 0.8071  | ns              |            |         |                                      |              | -1.683    | 2.671               | -7.165 to 3.779     | 0.6338   | 0.514   | ns              | -6.406   | 2.017               | -10.53 to -2.279     | 1.325        | 0.1889 | ns |  |  |  |  |  |  |  |
|                                 | Season(1)   Breed(1) | 0.2276                  | 0.549                                | -10.11 to 10.57     | 0.04508  | 0.9644  | ns              |  |  |  |              | 4.712     | 4.789                | -5.098 to 14.52     | 0.9839   | 0.3336  | ns              |            |         |                                      |              | 6.449     | 4.937               | -3.664 to 16.56     | 1.306    | 0.0221  | **              | 5.972    | 0.153               | -4.583 to 16.53      | 1.159        | 0.2562 | ns |  |  |  |  |  |  |  |
|                                 | Season(2)   Breed(1) | -2.483                  | 3.013                                | -8.654 to 3.688     | 0.8242   | 0.4168  | ns              |  |  |  |              | 0.2897    | 2.483                | -4.564 to 5.144     | 0.1014   | 0.92    | ns              |            |         |                                      |              | 0.8566    | 0.3956              | -0.923 to 2.544     | 0.2862   | 0.7843  | ns              | -13.38   | 0.749               | -20.59 to -6.17      | 2.307        | 0.0287 | ** |  |  |  |  |  |  |  |
|                                 | Season(3)   EPEF     | -0.00867                | 0.0158                               | -0.04223 to 0.02249 | 0.6246   | 0.5373  | ns              |  |  |  |              | -0.00507  | 0.01488              | -0.02676 to 0.02028 | 0.3383   | 0.7378  | ns              |            |         |                                      |              | -0.000661 | 0.01545             | -0.04120 to 0.02028 | 0.619    | 0.5409  | ns              | -0.02488 | 0.02162             | -0.05790 to 0.008146 | 1.543        | 0.134  | ns |  |  |  |  |  |  |  |
|                                 | Season(1)   EPEF     | 0.00786                 | 0.03027                              | -0.06426 to 0.06970 | 0.2539   | 0.8014  | ns              |  |  |  |              | 0.03234   | 0.02871              | -0.02648 to 0.09415 | 1.126    | 0.2686  | ns              |            |         |                                      |              | 0.04595   | 0.02596             | -0.07178 to 0.1042  | 1.471    | 0.1524  | ns              | 0.03396  | 0.03089             | -0.02368 to 0.1029   | 1.282        | 0.2104 | ns |  |  |  |  |  |  |  |
|                                 | Season(2)   EPEF     | 0.0144                  | 0.01719                              | -0.04960 to 0.02081 | 0.8377   | 0.4093  | ns              |  |  |  |              | 0.0005138 | 0.0163               | -0.03288 to 0.03390 | 0.03152  | 0.9751  | ns              |            |         |                                      |              | 0.004155  | 0.01778             | -0.04477 to 0.02027 | 0.8037   | 0.4215  | ns              | 0.07778  | 0.02008             | -0.00008             | 0.9284       | 0.028  | ns |  |  |  |  |  |  |  |
| Breed(1)   EPEF                 | 0.02173              | 0.01387                 | -0.009526 to 0.05292                 | 1.572               | 0.1272   | ns      |                 |  |  |  | 0.01781      | 0.01515   | -0.009134 to 0.04475 | 1.354               | 0.1868   | ns      |                 |            |         |                                      | 0.009788     | 0.02596   | -0.01798 to 0.03756 | 1.421               | 0.1673   | ns      | -0.030391       | 0.03415  | -0.05268 to 0.02529 | 0.2609               | 0.7981       | ns     |    |  |  |  |  |  |  |  |
| Goodness of Fit                 | R squared            |                         |                                      |                     |          |         |                 |  |  |  |              |           |                      |                     |          |         |                 |            |         |                                      |              |           |                     |                     |          |         |                 |          |                     |                      |              |        |    |  |  |  |  |  |  |  |
| Degrees of Freedom              | 28                   |                         |                                      |                     |          |         |                 |  |  |  |              |           |                      |                     |          |         |                 |            |         |                                      |              |           |                     |                     |          |         |                 |          |                     |                      |              |        |    |  |  |  |  |  |  |  |
| Multicollinearity               |                      |                         |                                      |                     |          |         |                 |  |  |  |              |           |                      |                     |          |         |                 |            |         |                                      |              |           |                     |                     |          |         |                 |          |                     |                      |              |        |    |  |  |  |  |  |  |  |
| Variable                        | VIF                  | R2 with other variables |                                      |                     |          |         |                 |  |  |  |              |           |                      |                     |          |         |                 |            |         |                                      |              |           |                     |                     |          |         |                 |          |                     |                      |              |        |    |  |  |  |  |  |  |  |
| [0]                             | Intercept            | 999.8                   | 0.999                                |                     |          |         |                 |  |  |  |              |           |                      |                     |          |         |                 | 999.8      | 0.999   |                                      |              |           |                     |                     |          |         |                 |          |                     |                      |              |        |    |  |  |  |  |  |  |  |
| [1]                             | Season(3)            | 959.8                   | 0.999                                |                     |          |         |                 |  |  |  |              |           |                      |                     |          |         |                 | 959.8      | 0.999   |                                      |              |           |                     |                     |          |         |                 |          |                     |                      |              |        |    |  |  |  |  |  |  |  |
| [2]                             | Season(1)            | 2147                    | 0.9995                               |                     |          |         |                 |  |  |  |              |           |                      |                     |          |         |                 | 2147       | 0.9995  |                                      |              |           |                     |                     |          |         |                 |          |                     |                      |              |        |    |  |  |  |  |  |  |  |
| [3]                             | Season(2)            | 1081                    | 0.9991                               |                     |          |         |                 |  |  |  |              |           |                      |                     |          |         |                 | 1081       | 0.9991  |                                      |              |           |                     |                     |          |         |                 |          |                     |                      |              |        |    |  |  |  |  |  |  |  |
| [4]                             | Breed(1)             | 512.3                   | 0.9981                               |                     |          |         |                 |  |  |  |              |           |                      |                     |          |         |                 | 512.9      | 0.9981  |                                      |              |           |                     |                     |          |         |                 |          |                     |                      |              |        |    |  |  |  |  |  |  |  |
| [5]                             | EPEF                 | 189.4                   | 0.9947                               |                     |          |         |                 |  |  |  |              |           |                      |                     |          |         |                 | 189.4      | 0.9947  |                                      |              |           |                     |                     |          |         |                 |          |                     |                      |              |        |    |  |  |  |  |  |  |  |
| [6]                             | Season(3)   Breed(1) | 222                     | 0.9955                               |                     |          |         |                 |  |  |  |              |           |                      |                     |          |         |                 | 222        | 0.9955  |                                      |              |           |                     |                     |          |         |                 |          |                     |                      |              |        |    |  |  |  |  |  |  |  |
| [7]                             | Season(2)   Breed(1) | 425                     | 0.9976                               |                     |          |         |                 |  |  |  |              |           |                      |                     |          |         |                 | 425        | 0.9976  |                                      |              |           |                     |                     |          |         |                 |          |                     |                      |              |        |    |  |  |  |  |  |  |  |
| [8]                             | Season(1)   Breed(1) | 243.4                   | 0.9959                               |                     |          |         |                 |  |  |  |              |           |                      |                     |          |         |                 | 243.4      | 0.9959  |                                      |              |           |                     |                     |          |         |                 |          |                     |                      |              |        |    |  |  |  |  |  |  |  |
| [9]                             | Season(3)   EPEF     | 482.6                   | 0.9979                               |                     |          |         |                 |  |  |  |              |           |                      |                     |          |         |                 | 482.6      | 0.9979  |                                      |              |           |                     |                     |          |         |                 |          |                     |                      |              |        |    |  |  |  |  |  |  |  |
| [10]                            | Season(1)   EPEF     | 1065                    | 0.9991                               |                     |          |         |                 |  |  |  |              |           |                      |                     |          |         |                 | 1065       | 0.9991  |                                      |              |           |                     |                     |          |         |                 |          |                     |                      |              |        |    |  |  |  |  |  |  |  |
| [11]                            | Season(2)   EPEF     | 561.8                   | 0.9982                               |                     |          |         |                 |  |  |  |              |           |                      |                     |          |         |                 | 561.8      | 0.9982  |                                      |              |           |                     |                     |          |         |                 |          |                     |                      |              |        |    |  |  |  |  |  |  |  |
| [12]                            | Breed(1)   EPEF      | 167.4                   | 0.994                                |                     |          |         |                 |  |  |  |              |           |                      |                     |          |         |                 | 167.4      | 0.994   |                                      |              |           |                     |                     |          |         |                 |          |                     |                      |              |        |    |  |  |  |  |  |  |  |
| Normality of Residuals          | Statistics           | P value                 | Passed normality test (alpha=0.05) ? |                     |          |         |                 |  |  |  |              |           |                      |                     |          |         |                 | Statistics | P value | Passed normality test (alpha=0.05) ? |              |           |                     |                     |          |         |                 |          |                     |                      |              |        |    |  |  |  |  |  |  |  |
| Anderson-Darling (A2)           | 0.1826               | 0.9056                  | Yes                                  |                     |          |         |                 |  |  |  |              |           |                      |                     |          |         |                 | 0.3451     | 0.4683  | Yes                                  |              |           |                     |                     |          |         |                 |          |                     |                      |              |        |    |  |  |  |  |  |  |  |
| D'Agostino-Pearson omnibus (K2) | 0.6835               | 0.7105                  | Yes                                  |                     |          |         |                 |  |  |  |              |           |                      |                     |          |         |                 | 2.057      | 0.3575  | Yes                                  |              |           |                     |                     |          |         |                 |          |                     |                      |              |        |    |  |  |  |  |  |  |  |
| Shapiro-Wilk (W)                | 0.9803               | 0.0076                  | Yes                                  |                     |          |         |                 |  |  |  |              |           |                      |                     |          |         |                 | 0.3843     | 0.5269  | Yes                                  |              |           |                     |                     |          |         |                 |          |                     |                      |              |        |    |  |  |  |  |  |  |  |
| Kolmogorov-Smirnov (distance)   | 0.07685              | >0.1000                 | Yes                                  |                     |          |         |                 |  |  |  |              |           |                      |                     |          |         |                 | 0.102      | >0.1000 | Yes                                  |              |           |                     |                     |          |         |                 |          |                     |                      |              |        |    |  |  |  |  |  |  |  |
| Rows in table                   | 45                   |                         |                                      |                     |          |         |                 |  |  |  |              |           |                      |                     |          |         |                 |            |         | 45                                   |              |           |                     |                     |          |         |                 |          |                     |                      |              |        |    |  |  |  |  |  |  |  |
| Rows skipped (missing data)     | 4                    |                         |                                      |                     |          |         |                 |  |  |  |              |           |                      |                     |          |         |                 |            |         | 4                                    |              |           |                     |                     |          |         |                 |          |                     |                      |              |        |    |  |  |  |  |  |  |  |
| Rows analyzed (if cases)        | 41                   |                         |                                      |                     |          |         |                 |  |  |  |              |           |                      |                     |          |         |                 |            |         | 41                                   |              |           |                     |                     |          |         |                 |          |                     |                      |              |        |    |  |  |  |  |  |  |  |
| Number of parameter estimates   | 13                   |                         |                                      |                     |          |         |                 |  |  |  |              |           |                      |                     |          |         |                 |            |         | 13                                   |              |           |                     |                     |          |         |                 |          |                     |                      |              |        |    |  |  |  |  |  |  |  |
| Residuals/parameters            | 3.2                  |                         |                                      |                     |          |         |                 |  |  |  |              |           |                      |                     |          |         |                 |            |         | 3.2                                  |              |           |                     |                     |          |         |                 |          |                     |                      |              |        |    |  |  |  |  |  |  |  |

| Dependent variable   | IgY anti-ACT                |            |                |                                     |          |         |                 |  |  |  | IgY anti-DNA |          |                 |                     |                         |                                     |                 |    |  |  | IgY anti-TNP |          |                |                     |                 |                         |                 |                                     |        |                    | IgY anti-LPS |        |  |  |  |  |                 |    |       |       |       |     |  |  |  |  |  |  |  |  |  |
|----------------------|-----------------------------|------------|----------------|-------------------------------------|----------|---------|-----------------|--|--|--|--------------|----------|-----------------|---------------------|-------------------------|-------------------------------------|-----------------|----|--|--|--------------|----------|----------------|---------------------|-----------------|-------------------------|-----------------|-------------------------------------|--------|--------------------|--------------|--------|--|--|--|--|-----------------|----|-------|-------|-------|-----|--|--|--|--|--|--|--|--|--|
| Analysis of Variance | SS                          | DF         | MS             | F (DFn, DFd)                        | P value  |         |                 |  |  |  | SS           | DF       | MS              | F (DFn, DFd)        | P value                 |                                     |                 |    |  |  | SS           | DF       | MS             | F (DFn, DFd)        | P value         |                         |                 |                                     |        |                    |              |        |  |  |  |  |                 |    |       |       |       |     |  |  |  |  |  |  |  |  |  |
| Regression           | 3.017                       | 12         | 0.2514         | F (12, 28) = 1.022                  | P=0.4560 |         |                 |  |  |  | 6.225        | 12       | 0.5188          | F (12, 28) = 6.785  | P=0.0001                |                                     |                 |    |  |  | 4.731        | 12       | 0.3942         | F (12, 28) = 0.9247 | P=0.5368        |                         |                 |                                     |        |                    |              |        |  |  |  |  |                 |    |       |       |       |     |  |  |  |  |  |  |  |  |  |
| Residual             | 5.885                       | 28         | 0.2102         |                                     |          |         |                 |  |  |  |              |          |                 | 4.367               | 28                      | 0.156                               |                 |    |  |  |              |          |                |                     |                 |                         | 4.614           | 12                                  | 0.3845 | F (12, 28) = 1.860 | P=0.0699     |        |  |  |  |  |                 |    |       |       |       |     |  |  |  |  |  |  |  |  |  |
| Total                | 8.902                       | 40         | 0.2225         |                                     |          |         |                 |  |  |  |              |          |                 | 6.088               | 40                      | 0.152                               |                 |    |  |  |              |          |                |                     |                 |                         | 9.346           | 40                                  | 0.2336 |                    |              |        |  |  |  |  |                 |    |       |       |       |     |  |  |  |  |  |  |  |  |  |
| Parameter estimates  | Variable                    | Estimate   | Standard error | 95% CI (asymptotic)                 | t        | P value | P value summary |  |  |  |              | Estimate | Standard error  | 95% CI (asymptotic) | t                       | P value                             | P value summary |    |  |  |              | Estimate | Standard error | 95% CI (asymptotic) | t               | P value                 | P value summary |                                     |        |                    |              |        |  |  |  |  |                 |    |       |       |       |     |  |  |  |  |  |  |  |  |  |
| [0]                  | Intercept                   | 3.228      | 3.993          | -16.41 to 10.498                    | 2.06     | 0.0488  | *               |  |  |  |              |          | -3.239          | 2.227               | -7.800 to 1.323         | 1.454                               | 0.157           | ns |  |  |              |          |                | -7.999              | 3.549           | -15.27 to -0.7291       | 2.254           | 0.0302                              | *      |                    |              |        |  |  |  |  |                 |    |       |       |       |     |  |  |  |  |  |  |  |  |  |
|                      | Season(3)                   | 7.238      | 0.273          | -3.463 to 18.14                     | 1.392    | 0.175   | ns              |  |  |  |              |          | 3.487           | 2.34                | -2.536 to 9.511         | 1.186                               | 0.2456          | ns |  |  |              |          |                | 5.549               | 4.2             | -3.054 to 14.15         | 1.321           | 0.1971                              | ns     |                    |              |        |  |  |  |  |                 |    |       |       |       |     |  |  |  |  |  |  |  |  |  |
|                      | Season(1)                   | 19.4       | 10.15          | -1.400 to 40.19                     | 1.911    | 0.0684  | ns              |  |  |  |              |          | -4.158          | 5.652               | -15.76 to 7.439         | 0.7345                              | 0.4688          | ns |  |  |              |          |                | 2.487               | 5.652           | -8.311 to 13.28         | 0.397           | 0.7011                              | ns     |                    |              |        |  |  |  |  |                 |    |       |       |       |     |  |  |  |  |  |  |  |  |  |
|                      | Season(2)                   | 7.176      | 5.747          | -4.597 to 18.95                     | 1.245    | 0.2222  | ns              |  |  |  |              |          | 0.0806          | 3.205               | -5.957 to 7.174         | 0.1899                              | 0.8506          | ns |  |  |              |          |                | 1.796               | 4.578           | -7.581 to 11.16         | 0.3902          | 0.6993                              | ns     |                    |              |        |  |  |  |  |                 |    |       |       |       |     |  |  |  |  |  |  |  |  |  |
|                      | Breed(1)                    | 6.225      | 3.688          | -1.350 to 13.80                     | 1.683    | 0.1004  | ns              |  |  |  |              |          | 2.681           | 2.062               | -1.564 to 8.885         | 1.29                                | 0.2075          | ns |  |  |              |          |                | 8.553               | 2.946           | -0.014 to 12.55         | 2.225           | 0.0343                              | *      |                    |              |        |  |  |  |  |                 |    |       |       |       |     |  |  |  |  |  |  |  |  |  |
|                      | EPEF                        | 0.03102    | 0.01297        | 0.004952 to 0.05609                 | 2.43     | 0.0218  | *               |  |  |  |              |          | 0.01534         | 0.007234            | 0.0005192 to 0.03015    | 2.12                                | 0.043           | *  |  |  |              |          |                | 0.00546             | 0.004783        | 0.000336 to 0.00959     | 2.378           | 0.0245                              | *      |                    |              |        |  |  |  |  |                 |    |       |       |       |     |  |  |  |  |  |  |  |  |  |
|                      | Season(3)   Breed(1)        | -0.076     | 2.912          | -10.04 to 9.824                     | 1.4      | 0.1725  | ns              |  |  |  |              |          | -0.302          | 2.319               | -4.964 to 4.688         | 1.009                               | 0.3217          | ns |  |  |              |          |                | 1.782               | 2.718           | -3.208 to 0.2017        | 1.208           | 0.2017                              | ns     |                    |              |        |  |  |  |  |                 |    |       |       |       |     |  |  |  |  |  |  |  |  |  |
|                      | Season(1)   Breed(1)        | -10.64     | 5.381          | -21.66 to 0.3865                    | 1.977    | 0.058   | *               |  |  |  |              |          | 2.121           | 3.001               | -4.026 to 8.267         | 0.7068                              | 0.4826          | ns |  |  |              |          |                | 0.9565              | 4.286           | -7.822 to 9.78          | 0.2232          | 0.825                               | ns     |                    |              |        |  |  |  |  |                 |    |       |       |       |     |  |  |  |  |  |  |  |  |  |
|                      | Season(2)   Breed(1)        | -3.76      | 3.211          | -10.34 to 2.817                     | 1.174    | 0.2515  | ns              |  |  |  |              |          | -3.76           | 2.587               | -10.34 to 2.817         | 1.097                               | 0.282           | ns |  |  |              |          |                | -3.76               | 2.587           | -10.34 to 2.817         | 1.097           | 0.282                               | ns     |                    |              |        |  |  |  |  |                 |    |       |       |       |     |  |  |  |  |  |  |  |  |  |
|                      | Season(3)   EPEF            | -0.02058   | 0.01683        | -0.05955 to 0.002422                | 1.489    | 0.1477  | ns              |  |  |  |              |          | -0.01226        | 0.003988            | -0.03149 to 0.008974    | 1.306                               | 0.2023          | ns |  |  |              |          |                | -0.01791            | 0.01341         | -0.04538 to 0.020555    | 1.336           | 0.1924                              | ns     |                    |              |        |  |  |  |  |                 |    |       |       |       |     |  |  |  |  |  |  |  |  |  |
| [1]                  | Season(2)   EPEF            | -0.06192   | 0.02326        | -0.1286 to 0.004164                 | 1.919    | 0.0693  | ns              |  |  |  |              |          | 0.01486         | 0.00579             | -0.02199 to 0.05171     | 0.8862                              | 0.4167          | ns |  |  |              |          |                | 0.008944            | 0.02569         | -0.04369 to 0.06158     | 0.3481          | 0.7304                              | ns     |                    |              |        |  |  |  |  |                 |    |       |       |       |     |  |  |  |  |  |  |  |  |  |
|                      | Season(3)   EPEF            | -0.02621   | 0.01681        | -0.06121 to 0.01361                 | 1.543    | 0.1262  | ns              |  |  |  |              |          | -0.01681        | 0.01027             | -0.02921 to 0.01133     | 0.1656                              | 0.8776          | ns |  |  |              |          |                | -0.01469            | 0.01681         | -0.03663 to 0.02133     | 0.3963          | 0.6963                              | ns     |                    |              |        |  |  |  |  |                 |    |       |       |       |     |  |  |  |  |  |  |  |  |  |
|                      | Breed(1)   EPEF             | -0.00643   | 0.00478        | -0.03870 to 0.02884                 | 0.4352   | 0.6668  | ns              |  |  |  |              |          | -0.005908       | 0.001924            | -0.02279 to 0.010797    | 0.717                               | 0.4763          | ns |  |  |              |          |                | -0.01659            | 0.01177         | -0.04070 to 0.007317    | 1.41            | 0.1606                              | ns     |                    |              |        |  |  |  |  |                 |    |       |       |       |     |  |  |  |  |  |  |  |  |  |
|                      | Goodness of Fit             |            |                |                                     |          |         |                 |  |  |  |              |          |                 |                     |                         |                                     |                 |    |  |  |              |          |                |                     |                 |                         |                 |                                     |        |                    |              |        |  |  |  |  |                 |    |       |       |       |     |  |  |  |  |  |  |  |  |  |
|                      | Degrees of Freedom          | 28         |                |                                     |          |         |                 |  |  |  |              | 28       |                 |                     |                         |                                     |                 |    |  |  |              | 28       |                |                     |                 |                         |                 |                                     |        |                    |              | 28     |  |  |  |  |                 |    |       |       |       |     |  |  |  |  |  |  |  |  |  |
|                      | R-squared                   | 0.3047     |                |                                     |          |         |                 |  |  |  |              | 0.7441   |                 |                     |                         |                                     |                 |    |  |  |              | 0.2838   |                |                     |                 |                         |                 |                                     |        |                    |              | 0.469  |  |  |  |  |                 |    |       |       |       |     |  |  |  |  |  |  |  |  |  |
|                      | Multicollinearity           | Variable   | VIF            | R2 with other variables             |          |         |                 |  |  |  |              |          | Variable        | VIF                 | R2 with other variables |                                     |                 |    |  |  |              |          |                | Variable            | VIF             | R2 with other variables |                 |                                     |        |                    |              |        |  |  |  |  |                 |    |       |       |       |     |  |  |  |  |  |  |  |  |  |
|                      | [2]                         | Intercept  | 60             |                                     |          |         |                 |  |  |  |              |          | 60              |                     |                         |                                     |                 |    |  |  |              |          | 60             |                     |                 |                         |                 |                                     |        |                    |              |        |  |  |  |  |                 |    |       |       |       |     |  |  |  |  |  |  |  |  |  |
|                      |                             | Season(3)  | 959.8          | 0.999                               |          |         |                 |  |  |  |              |          |                 | 959.8               | 0.999                   |                                     |                 |    |  |  |              |          |                |                     | 959.8           | 0.999                   |                 |                                     |        |                    |              |        |  |  |  |  |                 |    |       |       |       |     |  |  |  |  |  |  |  |  |  |
|                      |                             | Season(1)  | 2147           | 0.9995                              |          |         |                 |  |  |  |              |          |                 | 2147                | 0.9995                  |                                     |                 |    |  |  |              |          |                |                     | 2147            | 0.9995                  |                 |                                     |        |                    |              |        |  |  |  |  |                 |    |       |       |       |     |  |  |  |  |  |  |  |  |  |
| Season(2)            |                             | 1081       | 0.9991         |                                     |          |         |                 |  |  |  |              |          | 1081            | 0.9991              |                         |                                     |                 |    |  |  |              |          |                | 1081                | 0.9991          |                         |                 |                                     |        |                    |              |        |  |  |  |  |                 |    |       |       |       |     |  |  |  |  |  |  |  |  |  |
| Breed(1)             |                             | 512.9      | 0.9981         |                                     |          |         |                 |  |  |  |              |          | 512.9           | 0.9981              |                         |                                     |                 |    |  |  |              |          |                | 512.9               | 0.9981          |                         |                 |                                     |        |                    |              |        |  |  |  |  |                 |    |       |       |       |     |  |  |  |  |  |  |  |  |  |
| EPEF                 |                             | 189.4      | 0.9947         |                                     |          |         |                 |  |  |  |              |          | 189.4           | 0.9947              |                         |                                     |                 |    |  |  |              |          |                | 189.4               | 0.9947          |                         |                 |                                     |        |                    |              |        |  |  |  |  |                 |    |       |       |       |     |  |  |  |  |  |  |  |  |  |
| Season(3)   Breed(1) |                             | 222        | 0.9955         |                                     |          |         |                 |  |  |  |              |          | 222             | 0.9955              |                         |                                     |                 |    |  |  |              |          |                | 222                 | 0.9955          |                         |                 |                                     |        |                    |              |        |  |  |  |  |                 |    |       |       |       |     |  |  |  |  |  |  |  |  |  |
| Season(1)   Breed(1) |                             | 425        | 0.9976         |                                     |          |         |                 |  |  |  |              |          | 425             | 0.9976              |                         |                                     |                 |    |  |  |              |          |                | 425                 | 0.9976          |                         |                 |                                     |        |                    |              |        |  |  |  |  |                 |    |       |       |       |     |  |  |  |  |  |  |  |  |  |
| Season(2)   Breed(1) |                             | 243.4      | 0.9959         |                                     |          |         |                 |  |  |  |              |          | 243.4           | 0.9959              |                         |                                     |                 |    |  |  |              |          |                | 243.4               | 0.9959          |                         |                 |                                     |        |                    |              |        |  |  |  |  |                 |    |       |       |       |     |  |  |  |  |  |  |  |  |  |
| Season(3)   EPEF     |                             | 482.6      | 0.9979         |                                     |          |         |                 |  |  |  |              |          | 482.6           | 0.9979              |                         |                                     |                 |    |  |  |              |          |                | 482.6               | 0.9979          |                         |                 |                                     |        |                    |              |        |  |  |  |  |                 |    |       |       |       |     |  |  |  |  |  |  |  |  |  |
| [3]                  | Season(2)   EPEF            | 1065       | 0.9991         |                                     |          |         |                 |  |  |  |              |          | 1065            | 0.9991              |                         |                                     |                 |    |  |  |              |          |                | 1065                | 0.9991          |                         |                 |                                     |        |                    |              |        |  |  |  |  |                 |    |       |       |       |     |  |  |  |  |  |  |  |  |  |
|                      | Breed(1)   EPEF             | 561.8      | 0.9982         |                                     |          |         |                 |  |  |  |              |          | 561.8           | 0.9982              |                         |                                     |                 |    |  |  |              |          |                | 561.8               | 0.9982          |                         |                 |                                     |        |                    |              |        |  |  |  |  |                 |    |       |       |       |     |  |  |  |  |  |  |  |  |  |
|                      | Goodness of Fit             |            |                |                                     |          |         |                 |  |  |  |              |          |                 |                     |                         |                                     |                 |    |  |  |              |          |                |                     |                 |                         |                 |                                     |        |                    |              |        |  |  |  |  |                 |    |       |       |       |     |  |  |  |  |  |  |  |  |  |
|                      | Degrees of Freedom          | 28         |                |                                     |          |         |                 |  |  |  |              | 28       |                 |                     |                         |                                     |                 |    |  |  |              | 28       |                |                     |                 |                         |                 |                                     |        |                    |              | 28     |  |  |  |  |                 |    |       |       |       |     |  |  |  |  |  |  |  |  |  |
|                      | R-squared                   | 0.7441     |                |                                     |          |         |                 |  |  |  |              | 0.7441   |                 |                     |                         |                                     |                 |    |  |  |              | 0.7441   |                |                     |                 |                         |                 |                                     |        |                    |              | 0.7441 |  |  |  |  |                 |    |       |       |       |     |  |  |  |  |  |  |  |  |  |
|                      | Normality of Residuals      | Statistics | P value        | Passed normality test (alpha=0.05)? |          |         |                 |  |  |  |              |          | P value summary | Statistics          | P value                 | Passed normality test (alpha=0.05)? |                 |    |  |  |              |          |                |                     | P value summary | Statistics              | P value         | Passed normality test (alpha=0.05)? |        |                    |              |        |  |  |  |  | P value summary |    |       |       |       |     |  |  |  |  |  |  |  |  |  |
|                      | Anderson-Darling (A2)       | 0.2692     | 0.6237         | Yes                                 |          |         |                 |  |  |  |              |          |                 | ns                  | 0.6237                  | Yes                                 |                 |    |  |  |              |          |                |                     |                 | ns                      | 0.6256          | 0.0663                              | Yes    |                    |              |        |  |  |  |  |                 |    | ns    | 0.472 | 0.232 | Yes |  |  |  |  |  |  |  |  |  |
|                      | D'Agostino-P (normality K2) | 0.2859     | 0.6002         | Yes                                 |          |         |                 |  |  |  |              |          |                 | ns                  | 0.6002                  | Yes                                 |                 |    |  |  |              |          |                |                     |                 | ns                      | 0.6002          | 0.0663                              | Yes    |                    |              |        |  |  |  |  |                 |    | ns    | 0.472 | 0.232 | Yes |  |  |  |  |  |  |  |  |  |
|                      | Shapiro-Wilk (W)            | 0.9792     | 0.6077         | Yes                                 |          |         |                 |  |  |  |              |          |                 | ns                  | 0.6077                  | Yes                                 |                 |    |  |  |              |          |                |                     |                 | ns                      | 0.6077          | 0.0663                              | Yes    |                    |              |        |  |  |  |  |                 |    | ns    | 0.472 | 0.232 | Yes |  |  |  |  |  |  |  |  |  |
|                      | Shapiro-Wilk (W)            | 0.9792     | 0.6077         | Yes                                 |          |         |                 |  |  |  |              |          |                 | ns                  | 0.6077                  | Yes                                 |                 |    |  |  |              |          |                |                     |                 | ns                      | 0.6077          | 0.0663                              | Yes    |                    |              |        |  |  |  |  |                 |    | ns    | 0.472 | 0.232 | Yes |  |  |  |  |  |  |  |  |  |
| Shapiro-Wilk (W)     | 0.9792                      | 0.6077     | Yes            |                                     |          |         |                 |  |  |  |              |          | ns              | 0.6077              | Yes                     |                                     |                 |    |  |  |              |          |                |                     | ns              | 0.6077                  | 0.0663          | Yes                                 |        |                    |              |        |  |  |  |  |                 | ns | 0.472 | 0.232 | Yes   |     |  |  |  |  |  |  |  |  |  |
| Shapiro-Wilk (W)     | 0.9792                      | 0.6077     | Yes            |                                     |          |         |                 |  |  |  |              |          | ns              | 0.6077              | Yes                     |                                     |                 |    |  |  |              |          |                |                     | ns              | 0.6077                  | 0.0663          | Yes                                 |        |                    |              |        |  |  |  |  |                 | ns | 0.472 | 0.232 | Yes   |     |  |  |  |  |  |  |  |  |  |
| Shapiro-Wilk (W)     | 0.9792                      | 0.6077     | Yes            |                                     |          |         |                 |  |  |  |              |          | ns              | 0.6077              | Yes                     |                                     |                 |    |  |  |              |          |                |                     | ns              | 0.6077                  | 0.0663          | Yes                                 |        |                    |              |        |  |  |  |  |                 | ns | 0.472 | 0.232 | Yes   |     |  |  |  |  |  |  |  |  |  |
| Shapiro-Wilk (W)     | 0.9792                      | 0.6077     | Yes            |                                     |          |         |                 |  |  |  |              |          | ns              | 0.6077              | Yes                     |                                     |                 |    |  |  |              |          |                |                     | ns              | 0.6077                  | 0.0663          | Yes                                 |        |                    |              |        |  |  |  |  |                 | ns | 0.472 | 0.232 | Yes   |     |  |  |  |  |  |  |  |  |  |
| Shapiro-Wilk (W)     | 0.9792                      | 0.6077     | Yes            |                                     |          |         |                 |  |  |  |              |          | ns              | 0.6077              | Yes                     |                                     |                 |    |  |  |              |          |                |                     | ns              | 0.6077                  | 0.0663          | Yes                                 |        |                    |              |        |  |  |  |  |                 | ns | 0.472 | 0.232 | Yes   |     |  |  |  |  |  |  |  |  |  |
| Shapiro-Wilk (W)     | 0.9792                      | 0.6077     | Yes            |                                     |          |         |                 |  |  |  |              |          | ns              | 0.6077              | Yes                     |                                     |                 |    |  |  |              |          |                |                     | ns              | 0.6077                  | 0.0663          | Yes                                 |        |                    |              |        |  |  |  |  |                 | ns | 0.472 | 0.232 | Yes   |     |  |  |  |  |  |  |  |  |  |
| Shapiro-Wilk (W)     | 0.9792                      | 0.6077     | Yes            |                                     |          |         |                 |  |  |  |              |          | ns              | 0.6077              | Yes                     |                                     |                 |    |  |  |              |          |                |                     | ns              | 0.6077                  | 0.0663          | Yes                                 |        |                    |              |        |  |  |  |  |                 | ns | 0.472 | 0.232 | Yes   |     |  |  |  |  |  |  |  |  |  |
| Shapiro-Wilk (W)     | 0.9792                      | 0.6077     | Yes            |                                     |          |         |                 |  |  |  |              |          | ns              | 0.6077              | Yes                     |                                     |                 |    |  |  |              |          |                |                     | ns              | 0.6077                  | 0.0663          | Yes                                 |        |                    |              |        |  |  |  |  |                 | ns | 0.472 | 0.232 | Yes   |     |  |  |  |  |  |  |  |  |  |
| Shapiro-Wilk (W)     | 0.9792                      | 0.6077     | Yes            |                                     |          |         |                 |  |  |  |              |          | ns              | 0.6077              | Yes                     |                                     |                 |    |  |  |              |          |                |                     | ns              | 0.6077                  | 0.0663          | Yes                                 |        |                    |              |        |  |  |  |  |                 | ns | 0.472 | 0.232 | Yes   |     |  |  |  |  |  |  |  |  |  |
| Shapiro-Wilk (W)     | 0.9792                      | 0.6077     | Yes            |                                     |          |         |                 |  |  |  |              |          | ns              | 0.6077              | Yes                     |                                     |                 |    |  |  |              |          |                |                     | ns              | 0.6077                  | 0.0663          | Yes                                 |        |                    |              |        |  |  |  |  |                 | ns | 0.472 | 0.232 | Yes   |     |  |  |  |  |  |  |  |  |  |
| Shapiro-Wilk (W)     | 0.9792                      | 0.6077     | Yes            |                                     |          |         |                 |  |  |  |              |          | ns              | 0.6077              | Yes                     |                                     |                 |    |  |  |              |          |                |                     | ns              | 0.6077                  | 0.0663          | Yes                                 |        |                    |              |        |  |  |  |  |                 | ns | 0.472 | 0.232 | Yes   |     |  |  |  |  |  |  |  |  |  |
| Shapiro-Wilk (W)     | 0.9792                      | 0.6077     | Yes            |                                     |          |         |                 |  |  |  |              |          | ns              | 0.6077              | Yes                     |                                     |                 |    |  |  |              |          |                |                     | ns              | 0.6077                  | 0.0663          | Yes                                 |        |                    |              |        |  |  |  |  |                 | ns | 0.472 | 0.232 | Yes   |     |  |  |  |  |  |  |  |  |  |
| Shapiro-Wilk (W)     | 0.9792                      | 0.6077     | Yes            |                                     |          |         |                 |  |  |  |              |          | ns              | 0.6077              | Yes                     |                                     |                 |    |  |  |              |          |                |                     | ns              | 0.6077                  | 0.0663          | Yes                                 |        |                    |              |        |  |  |  |  |                 | ns | 0.472 | 0.232 | Yes   |     |  |  |  |  |  |  |  |  |  |
| Shapiro-Wilk (W)     | 0.9792                      | 0.6077     | Yes            |                                     |          |         |                 |  |  |  |              |          | ns              | 0.6077              | Yes                     |                                     |                 |    |  |  |              |          |                |                     | ns              | 0.6077                  | 0.0663          | Yes                                 |        |                    |              |        |  |  |  |  |                 | ns | 0.472 | 0.232 | Yes   |     |  |  |  |  |  |  |  |  |  |
| Shapiro-Wilk (W)     | 0.9792                      | 0.6077     | Yes            |                                     |          |         |                 |  |  |  |              |          | ns              | 0.6077              | Yes                     |                                     |                 |    |  |  |              |          |                |                     | ns              | 0.6077                  | 0.0663          | Yes                                 |        |                    |              |        |  |  |  |  |                 | ns | 0.472 | 0.232 | Yes   |     |  |  |  |  |  |  |  |  |  |
| Shapiro-Wilk (W)     | 0.9792                      | 0.6077     | Yes            |                                     |          |         |                 |  |  |  |              |          | ns              | 0.6077              | Yes                     |                                     |                 |    |  |  |              |          |                |                     | ns              | 0.6077                  | 0.0663          | Yes                                 |        |                    |              |        |  |  |  |  |                 | ns | 0.472 | 0.232 | Yes   |     |  |  |  |  |  |  |  |  |  |
| Shapiro-Wilk (W)     | 0.9792                      | 0.6077     | Yes            |                                     |          |         |                 |  |  |  |              |          | ns              | 0.6077              | Yes                     |                                     |                 |    |  |  |              |          |                |                     | ns              | 0.6077                  | 0.0663          | Yes                                 |        |                    |              |        |  |  |  |  |                 | ns | 0.472 | 0.232 | Yes   |     |  |  |  |  |  |  |  |  |  |
| Shapiro-Wilk (W)     | 0.9792                      | 0.6077     | Yes            |                                     |          |         |                 |  |  |  |              |          | ns              | 0.6077              | Yes                     |                                     |                 |    |  |  |              |          |                |                     | ns              | 0.6077                  | 0.0663          | Yes                                 |        |                    |              |        |  |  |  |  |                 | ns | 0.472 | 0.232 | Yes   |     |  |  |  |  |  |  |  |  |  |
| Shapiro-Wilk (W)     | 0.9792                      | 0.6077     | Yes            |                                     |          |         |                 |  |  |  |              |          | ns              | 0.6077              | Yes                     |                                     |                 |    |  |  |              |          |                |                     | ns              | 0.6077                  | 0.0663          | Yes                                 |        |                    |              |        |  |  |  |  |                 | ns | 0.472 | 0.232 | Yes   |     |  |  |  |  |  |  |  |  |  |
| Shapiro-Wilk (W)     | 0.9792                      | 0.6077     | Yes            |                                     |          |         |                 |  |  |  |              |          | ns              | 0.6077              | Yes                     |                                     |                 |    |  |  |              |          |                |                     | ns              | 0.6077                  | 0.0663          | Yes                                 |        |                    |              |        |  |  |  |  |                 | ns | 0.472 | 0.232 | Yes   |     |  |  |  |  |  |  |  |  |  |
| Shapiro-Wilk (W)     | 0.9792                      | 0.6077     | Yes            |                                     |          |         |                 |  |  |  |              |          | ns              | 0.6077              | Yes                     |                                     |                 |    |  |  |              |          |                |                     | ns              | 0.6077                  | 0.0663          | Yes                                 |        |                    |              |        |  |  |  |  |                 | ns | 0.472 | 0.232 | Yes   |     |  |  |  |  |  |  |  |  |  |
| Shapiro-Wilk (W)     | 0.9792                      | 0.6077     | Yes            |                                     |          |         |                 |  |  |  |              |          | ns              | 0.6077              | Yes                     |                                     |                 |    |  |  |              |          |                |                     | ns              | 0.6077                  | 0.0663          | Yes                                 |        |                    |              |        |  |  |  |  |                 | ns | 0.472 | 0.232 | Yes   |     |  |  |  |  |  |  |  |  |  |
| Shapiro-Wilk (W)     | 0.9792                      | 0.6077     | Yes            |                                     |          |         |                 |  |  |  |              |          | ns              | 0.6077              | Yes                     |                                     |                 |    |  |  |              |          |                |                     | ns              | 0.6077                  | 0.0663          | Yes                                 |        |                    |              |        |  |  |  |  |                 | ns | 0.472 | 0.232 | Yes   |     |  |  |  |  |  |  |  |  |  |
| Shapiro-Wilk (W)     | 0.9792                      | 0.6077     | Yes            |                                     |          |         |                 |  |  |  |              |          | ns              | 0.6077              | Yes                     |                                     |                 |    |  |  |              |          |                |                     | ns              | 0.6077                  | 0.0663          | Yes                                 |        |                    |              |        |  |  |  |  |                 | ns | 0.472 | 0.232 | Yes   |     |  |  |  |  |  |  |  |  |  |
| Shapiro-Wilk (W)     | 0.9792                      | 0.6077     | Yes            |                                     |          |         |                 |  |  |  |              |          | ns              | 0.6077              | Yes                     |                                     |                 |    |  |  |              |          |                |                     | ns              | 0.6077                  | 0.0663          | Yes                                 |        |                    |              |        |  |  |  |  |                 | ns | 0.472 | 0.232 | Yes   |     |  |  |  |  |  |  |  |  |  |
| Shapiro-Wilk (W)     | 0.9792                      | 0.6077     | Yes            |                                     |          |         |                 |  |  |  |              |          | ns              | 0.6077              | Yes                     |                                     |                 |    |  |  |              |          |                |                     | ns              | 0.6077                  | 0.0663          | Yes                                 |        |                    |              |        |  |  |  |  |                 | ns | 0.472 | 0.232 | Yes   |     |  |  |  |  |  |  |  |  |  |
| Shapiro-Wilk (W)     | 0.9792                      | 0.6077     | Yes            |                                     |          |         |                 |  |  |  |              |          | ns              | 0.6077              | Yes                     |                                     |                 |    |  |  |              |          |                |                     | ns              | 0.6077                  | 0.0663          | Yes                                 |        |                    |              |        |  |  |  |  |                 | ns | 0.472 | 0.232 | Yes   |     |  |  |  |  |  |  |  |  |  |
| Shapiro-Wilk (W)     | 0.9792                      | 0.6077     | Yes            |                                     |          |         |                 |  |  |  |              |          | ns              | 0.6077              | Yes                     |                                     |                 |    |  |  |              |          |                |                     | ns              | 0.6077                  | 0.0663          | Yes                                 |        |                    |              |        |  |  |  |  |                 | ns | 0.472 | 0.232 | Yes   |     |  |  |  |  |  |  |  |  |  |
| Shapiro-Wilk (W)     | 0.9792                      | 0.6077     | Yes            |                                     |          |         |                 |  |  |  |              |          | ns              | 0.6077              | Yes                     |                                     |                 |    |  |  |              |          |                |                     | ns              | 0.6077                  | 0.0663          | Yes                                 |        |                    |              |        |  |  |  |  |                 | ns | 0.472 | 0.232 | Yes   |     |  |  |  |  |  |  |  |  |  |
| Shapiro-Wilk (W)     | 0.9792                      | 0.6077     | Yes            |                                     |          |         |                 |  |  |  |              |          | ns              | 0.6077              | Yes                     |                                     |                 |    |  |  |              |          |                |                     | ns              | 0.6077                  | 0.0663          | Yes                                 |        |                    |              |        |  |  |  |  |                 | ns | 0.472 | 0.232 | Yes   |     |  |  |  |  |  |  |  |  |  |
| Shapiro-Wilk (W)     | 0.9792                      | 0.6077     | Yes            |                                     |          |         |                 |  |  |  |              |          | ns              | 0.6077              | Yes                     |                                     |                 |    |  |  |              |          |                |                     | ns              | 0.6077                  | 0.0663          | Yes                                 |        |                    |              |        |  |  |  |  |                 | ns | 0.472 | 0.232 | Yes   |     |  |  |  |  |  |  |  |  |  |
| Shapiro-Wilk (W)     | 0.9792                      | 0.6077     | Yes            |                                     |          |         |                 |  |  |  |              |          | ns              | 0.6077              | Yes                     |                                     |                 |    |  |  |              |          |                |                     | ns              | 0.6077                  | 0.0663          | Yes                                 |        |                    |              |        |  |  |  |  |                 | ns | 0.472 | 0.232 | Yes   |     |  |  |  |  |  |  |  |  |  |
| Shapiro-Wilk (W)     | 0.9792                      | 0.6077     | Yes            |                                     |          |         |                 |  |  |  |              |          | ns              | 0.6077              | Yes                     |                                     |                 |    |  |  |              |          |                |                     | ns              | 0.6077                  | 0.0663          | Yes                                 |        |                    |              |        |  |  |  |  |                 | ns | 0.472 | 0.232 | Yes   |     |  |  |  |  |  |  |  |  |  |
| Shapiro-Wilk (W)     | 0.9792                      | 0.6077     | Yes            |                                     |          |         |                 |  |  |  |              |          | ns              | 0.6077              | Yes                     |                                     |                 |    |  |  |              |          |                |                     | ns              | 0.6077                  | 0.0663          | Yes                                 |        |                    |              |        |  |  |  |  |                 | ns | 0.472 | 0.232 | Yes   |     |  |  |  |  |  |  |  |  |  |
| Shapiro-Wilk (W)     | 0.9792                      | 0.6077     | Yes            |                                     |          |         |                 |  |  |  |              |          | ns              | 0.6077              | Yes                     |                                     |                 |    |  |  |              |          |                |                     | ns              | 0.6077                  | 0.0663          | Yes                                 |        |                    |              |        |  |  |  |  |                 | ns | 0.472 | 0.232 | Yes   |     |  |  |  |  |  |  |  |  |  |
| Shapiro-Wilk (W)     | 0.9792                      | 0.6077     | Yes            |                                     |          |         |                 |  |  |  |              |          | ns              | 0.6077              | Yes                     |                                     |                 |    |  |  |              |          |                |                     | ns              | 0.6077                  | 0.0663          | Yes                                 |        |                    |              |        |  |  |  |  |                 | ns | 0.472 | 0.232 | Yes   |     |  |  |  |  |  |  |  |  |  |
| Shapiro-Wilk (W)     | 0.9792                      | 0.6077     | Yes            |                                     |          |         |                 |  |  |  |              |          | ns              | 0.6077              | Yes                     |                                     |                 |    |  |  |              |          |                |                     | ns              | 0.6077                  | 0.0663          | Yes                                 |        |                    |              |        |  |  |  |  |                 | ns | 0.472 | 0.232 | Yes   |     |  |  |  |  |  |  |  |  |  |
| Shapiro-Wilk (W)     | 0.9792                      | 0.6077     | Yes            |                                     |          |         |                 |  |  |  |              |          | ns              | 0.6077              | Yes                     |                                     |                 |    |  |  |              |          |                |                     | ns              | 0.6077                  | 0.0663          | Yes                                 |        |                    |              |        |  |  |  |  |                 | ns | 0.472 | 0.2   |       |     |  |  |  |  |  |  |  |  |  |
