# Supplementary material for: Levels of Circulating IgM and IgY Natural Antibodies in Broiler Chicks: Association with Genotype and Farming Systems
Source: MDPI journal article supplement (doi:10.3390/biology12020304), 2023-02-14
Supplement: s1 [file s1]

| Principal Component Analysis      | IgM C (fast growth broilers)                          |          |        |        |         | IgM FR (slow growth broilers)                         |          |        |        |         |
|-----------------------------------|-------------------------------------------------------|----------|--------|--------|---------|-------------------------------------------------------|----------|--------|--------|---------|
| PC summary                        | PC1                                                   | PC2      | PC3    | PC4    | PC5     | PC1                                                   | PC2      | PC3    | PC4    | PC5     |
| Eigenvalue                        | 2.912                                                 | 1.104    | 0.6566 | 0.2007 | 0.1262  | 2.797                                                 | 1.048    | 0.8895 | 0.2015 | 0.06437 |
| Proportion of variance            | 58.25%                                                | 22.08%   | 13.13% | 4.01%  | 2.52%   | 55.93%                                                | 20.96%   | 17.79% | 4.03%  | 1.29%   |
| Cumulative proportion of variance | 58.25%                                                | 80.33%   | 93.46% | 97.48% | 100.00% | 55.93%                                                | 76.89%   | 94.68% | 98.71% | 100.00% |
| Component selection               | Selected                                              | Selected |        |        |         | Selected                                              | Selected |        |        |         |
| Data summary                      |                                                       |          |        |        |         |                                                       |          |        |        |         |
| Total number of variables         | 5                                                     |          |        |        |         | 5                                                     |          |        |        |         |
| Total number of components        | 5                                                     |          |        |        |         | 5                                                     |          |        |        |         |
| Component selection method        | PCs with eigenvalues greater than 1.0 ("Kaiser rule") |          |        |        |         | PCs with eigenvalues greater than 1.0 ("Kaiser rule") |          |        |        |         |
| Number of selected components     | 2                                                     |          |        |        |         | 2                                                     |          |        |        |         |
| Rows in table                     | 14                                                    |          |        |        |         | 14                                                    |          |        |        |         |
| Rows skipped (missing data)       | 0                                                     |          |        |        |         | 0                                                     |          |        |        |         |
| Rows analyzed (# cases)           | 14                                                    |          |        |        |         | 14                                                    |          |        |        |         |

| Principal Component Analysis      | IgY C (fast growth broilers)                          |          |        |        |         | IgY FR (slow growth broilers)                         |          |        |        |         |
|-----------------------------------|-------------------------------------------------------|----------|--------|--------|---------|-------------------------------------------------------|----------|--------|--------|---------|
| PC summary                        | PC1                                                   | PC2      | PC3    | PC4    | PC5     | PC1                                                   | PC2      | PC3    | PC4    | PC5     |
| Eigenvalue                        | 2.066                                                 | 1.47     | 0.9446 | 0.3092 | 0.2096  | 2.009                                                 | 1.397    | 0.7935 | 0.6426 | 0.1578  |
| Proportion of variance            | 41.32%                                                | 29.41%   | 18.89% | 6.18%  | 4.19%   | 40.19%                                                | 27.93%   | 15.87% | 12.85% | 3.16%   |
| Cumulative proportion of variance | 41.32%                                                | 70.73%   | 89.63% | 95.81% | 100.00% | 40.19%                                                | 68.12%   | 83.99% | 96.84% | 100.00% |
| Component selection               | Selected                                              | Selected |        |        |         | Selected                                              | Selected |        |        |         |
| Data summary                      |                                                       |          |        |        |         |                                                       |          |        |        |         |
| Total number of variables         | 5                                                     |          |        |        |         | 5                                                     |          |        |        |         |
| Total number of components        | 5                                                     |          |        |        |         | 5                                                     |          |        |        |         |
| Component selection method        | PCs with eigenvalues greater than 1.0 ("Kaiser rule") |          |        |        |         | PCs with eigenvalues greater than 1.0 ("Kaiser rule") |          |        |        |         |
| Number of selected components     | 2                                                     |          |        |        |         | 2                                                     |          |        |        |         |
| Rows in table                     | 14                                                    |          |        |        |         | 14                                                    |          |        |        |         |
| Rows skipped (missing data)       | 0                                                     |          |        |        |         | 0                                                     |          |        |        |         |
| Rows analyzed (# cases)           | 14                                                    |          |        |        |         | 14                                                    |          |        |        |         |
