# Supplementary material for: Levels of Circulating IgM and IgY Natural Antibodies in Broiler Chicks: Association with Genotype and Farming Systems
Source: MDPI journal article supplement (doi:10.3390/biology12020304), 2023-02-14
Supplement: s1 [file s1]

**Table S3.** Chemical analysis of the three different animal feeds.

|               | <b>Protein%</b> | <b>Fat%</b> | <b>Moisture%</b> | <b>Ash%</b> |
|---------------|-----------------|-------------|------------------|-------------|
| <b>Feed A</b> | 21,6            | 5,1         | 8,9              | 2,6         |
| <b>Feed B</b> | 21,5            | 5,2         | 9,2              | 2,2         |
| <b>Feed C</b> | 20,9            | 5,1         | 9,2              | 2,7         |

Feed A, Feed of the free range-chickens; Feed B, Feed of the free-range chickens dietary supplemented with a premix of oregano and oregano oil; Feed C, Feed of the conventional chickens.
