# Supplementary material for: Levels of Circulating IgM and IgY Natural Antibodies in Broiler Chicks: Association with Genotype and Farming Systems
Source: MDPI journal article supplement (doi:10.3390/biology12020304), 2023-02-14
Supplement: s1 [file s1]

**Table S2.** Chemical composition<sup>1</sup> of the conventional chickens' feed.

|                                       | <b>Starter<br/>(0 – 10 days)</b> |               | <b>Grower<br/>(11 -24 days)</b> |               | <b>Finisher 1<br/>(25 – 39 days)</b> |               | <b>Finisher 2<br/>(40 days –<br/>slaughter)</b> |               |
|---------------------------------------|----------------------------------|---------------|---------------------------------|---------------|--------------------------------------|---------------|-------------------------------------------------|---------------|
| <b>Metabolic Energy<br/>(kcal/kg)</b> | 3000                             |               | 3100                            |               | 3200                                 |               | 3200                                            |               |
| <b>Fibers (%)</b>                     | 2.4                              |               | 2.4                             |               | 2.3                                  |               | 2.2                                             |               |
| <b>Calcium (%)</b>                    | 0.96                             |               | 0.87                            |               | 0.78                                 |               | 0.75                                            |               |
| <b>Phosphorus (%)</b>                 | 0.48                             |               | 0.44                            |               | 0.39                                 |               | 0.38                                            |               |
| <b>Sodium (%)</b>                     | 0.16-0.23                        |               | 0.16-0.23                       |               | 0.16-0.20                            |               | 0.16-0.20                                       |               |
| <b>Chloride (%)</b>                   | 0.16-0.23                        |               | 0.16-0.23                       |               | 0.16-0.23                            |               | 0.16-0.23                                       |               |
| <b>Potassium (%)</b>                  | 0.40-1.00                        |               | -                               |               | -                                    |               | -                                               |               |
| <b>Amino Acids</b>                    | <b>Total</b>                     | <b>Digest</b> | <b>Total</b>                    | <b>Digest</b> | <b>Total</b>                         | <b>Digest</b> | <b>Total</b>                                    | <b>Digest</b> |
| <b>Lysine (%)</b>                     | 1.44                             | 1.28          | 1.29                            | 1.15          | 1.15                                 | 1.02          | 1.08                                            | 0.96          |
| <b>Methionine +Cysteine (%)</b>       | 1.08                             | 0.95          | 0.99                            | 0.87          | 0.90                                 | 0.80          | 0.85                                            | 0.75          |
| <b>Methionine (%)</b>                 | 0.56                             | 0.51          | 0.51                            | 0.47          | 0.47                                 | 0.43          | 0.44                                            | 0.40          |
| <b>Threonine (%)</b>                  | 0.97                             | 0.86          | 0.88                            | 0.77          | 0.78                                 | 0.68          | 0.73                                            | 0.64          |
| <b>Valine (%)</b>                     | 1.10                             | 0.96          | 1.00                            | 0.87          | 0.89                                 | 0.78          | 0.84                                            | 0.73          |
| <b>Isoleukine (%)</b>                 | 0.97                             | 0.86          | 0.89                            | 0.78          | 0.80                                 | 0.70          | 0.75                                            | 0.66          |
| <b>Arginine (%)</b>                   | 1.52                             | 1.37          | 1.37                            | 1.37          | 1.21                                 | 1.09          | 1.14                                            | 1.03          |
| <b>Tryptophan (%)</b>                 | 0.23                             | 0.20          | 0.21                            | 0.18          | 0.18                                 | 0.16          | 0.17                                            | 0.15          |
| <b>Leucine (%)</b>                    | 1.58                             | 1.41          | 1.42                            | 1.27          | 1.26                                 | 1.12          | 1.19                                            | 1.06          |

<sup>1</sup>Chemical composition was noted according to feed formulation and NIR tests for verification
