# Supplementary material for: Levels of Circulating IgM and IgY Natural Antibodies in Broiler Chicks: Association with Genotype and Farming Systems
Source: MDPI journal article supplement (doi:10.3390/biology12020304), 2023-02-14
Supplement: s1 [file s1]

| Date of placement | Date of slaughter | Production duration (d) | Genotype           | Samples (Serum) | Slaughtered chickens (Industry) | Losses% (Mean)+2% | Total weight (Kg) | Mean weight (Kg) | Paste total | FCR  | EPEF |
|-------------------|-------------------|-------------------------|--------------------|-----------------|---------------------------------|-------------------|-------------------|------------------|-------------|------|------|
| 19/10/2018        | 5/12/2018         | 47                      | ROSS 308 (C group) | 15              | 44951                           | 3.36              | 118958            | 2.646            | 215390      | 1.81 | 301  |
| 7/1/2019          | 21/2/2019         |                         |                    | 15              | 31172                           | 4.5               | 68954             | 2.212            | 113360      | 1.64 | 286  |
| 25/3/2019         | 9/5/2019          |                         |                    | 15              | 29050                           | 5.07              | 76111             | 2.62             | 137490      | 1.81 | 306  |
| 14/6/2019         | 31/7/2019         |                         |                    | 15              | 34690                           | 2.83              | 91110             | 2.626            | 164570      | 1.81 | 301  |
| 27/8/2019         | 16/10/2019        |                         |                    | 15              | 13568                           | 3.61              | 38531             | 2.84             | 68140       | 1.77 | 310  |
| 21/11/2019        | 11/1/2020         |                         |                    | 15              | 24852                           | 2.54              | 76299             | 3.07             | 135390      | 1.77 | 331  |
| 18/2/2020         | 4/4/2020          |                         |                    | 15              | 29231                           | 4.47              | 79051             | 2.704            | 136690      | 1.73 | 325  |
| 11/5/2020         | 25/6/2020         |                         |                    | 15              | 25030                           | 3.01              | 63300             | 2.529            | 106850      | 1.69 | 323  |
| 3/8/2020          | 15/9/2020         |                         |                    | 15              | 14640                           | 4.31              | 37243             | 2.544            | 67290       | 1.81 | 313  |
| 14/10/2020        | 30/11/2020        |                         |                    | 15              | 15376                           | 2.75              | 42728             | 2.779            | 75780       | 1.77 | 324  |
| 26/1/2021         | 11/3/2021         |                         |                    | 15              | 20861                           | 4.43              | 51529             | 2.47             | 88620       | 1.72 | 312  |
| 5/8/2021          | 18/09/21          |                         |                    | 15              | 21440                           | 9.6               | 55311             | 2.58             | 93340       | 1.69 | 326  |
| 19/10/2021        | 29/11/21          |                         |                    | 15              | 12840                           | 1.6               | 31680             | 2.467            | 56860       | 1.79 | 325  |
| 25/01/2022        | 10/3/2022         |                         |                    | 15              | 21900                           | 5                 | 50747             | 2.317            | 85310       | 1.68 | 300  |
| 28/9/2018         | 5/12/2018         | 67                      | SASSO (FR group)   | 15              | 6302                            | 1.93              | 14830             | 2.353            | 35850       | 2.42 | 140  |
| 14/12/2018        | 21/2/2019         |                         |                    | 15              | 5920                            | 3.27              | 13474             | 2.276            | 33830       | 2.51 | 127  |
| 8/3/2019          | 9/5/2019          |                         |                    | 15              | 5696                            | 7.7               | 13860             | 2.433            | 33300       | 2.4  | 151  |
| 22/5/2019         | 31/7/2019         |                         |                    | 15              | 6216                            | 4.78              | 14791             | 2.38             | 37670       | 2.55 | 127  |
| 9/8/2019          | 16/10/2019        |                         |                    | 15              | 5552                            | 9.28              | 14642             | 2.637            | 35550       | 2.43 | 145  |
| 6/11/2019         | 12/1/2020         |                         |                    | 15              | 6960                            | 5.23              | 17315             | 2.488            | 42040       | 2.43 | 145  |
| 28/1/2020         | 3/4/2020          |                         |                    | 15              | 6944                            | 2.75              | 16661             | 2.399            | 39530       | 2.37 | 149  |
| 21/4/2020         | 25/6/2020         |                         |                    | 15              | 5726                            | 4.85              | 14384             | 2.512            | 34060       | 2.37 | 155  |
| 8/7/2020          | 15/9/2020         |                         |                    | 15              | 5822                            | 4.87              | 14038             | 2.411            | 34240       | 2.44 | 136  |
| 22/9/2020         | 30/11/2020        |                         |                    | 15              | 5968                            | 2.48              | 15285             | 2.561            | 38500       | 2.52 | 144  |
| 1/1/2021          | 11/3/2021         |                         |                    | 15              | 6770                            | 5.18              | 19330             | 2.855            | 47850       | 2.48 | 159  |
| 12/7/2021         | 20/9/2021         |                         |                    | 15              | 5760                            | 5.88              | 13840             | 2.403            | 32360       | 2.34 | 138  |
| 29/9/2021         | 7/12/2021         |                         |                    | 15              | 5816                            | 4.97              | 15255             | 2.623            | 37540       | 2.46 | 147  |
| 4/1/2022          | 10/3/2022         |                         |                    | 15              | 5760                            | 1.45              | 13464             | 2.338            | 32640       | 2.42 | 146  |
| 14/12/2018        | 21/2/2019         | 67                      | SASSO (FRp group)  | 15              | 2825                            | 7.68              | 7300              | 2.584            | 18650       | 2.55 | 135  |
| 8/3/2019          | 9/5/2019          |                         |                    | 15              | 2870                            | 6.21              | 6910              | 2.408            | 16280       | 2.36 | 155  |
| 6/11/2019         | 10/1/2020         |                         |                    | 15              | 2944                            | 3.79              | 7420              | 2.52             | 18670       | 2.52 | 148  |
| 28/1/2020         | 2/4/2020          |                         |                    | 15              | 2960                            | 3.27              | 6900              | 2.331            | 16836       | 2.44 | 142  |
| 21/4/2020         | 24/6/2020         |                         |                    | 15              | 2912                            | 4.84              | 7170              | 2.462            | 17280       | 2.41 | 152  |
| 8/7/2020          | 15/9/2020         |                         |                    | 15              | 2868                            | 6.27              | 6920              | 2.413            | 17023       | 2.46 | 133  |
| 22/9/2020         | 30/11/2020        |                         |                    | 15              | 2960                            | 3.27              | 7370              | 2.49             | 18572       | 2.52 | 139  |
| 1/1/2021          | 11/3/2021         |                         |                    | 15              | 2972                            | 2.88              | 7770              | 2.614            | 19270       | 2.48 | 148  |
| 12/7/2021         | 18/9/2021         |                         |                    | 15              | 2768                            | 9.54              | 6550              | 2.366            | 16720       | 2.55 | 123  |

FCR: Feed Conversion Ratio

EPEF: European Production Efficiency Factor 
$$EPEF = \frac{BW (kg) \times Liveability (\%) }{FCR \times slaughter age (d)} \times 100$$
