# Supplementary material for: Levels of Circulating IgM and IgY Natural Antibodies in Broiler Chicks: Association with Genotype and Farming Systems
Source: MDPI journal article supplement (doi:10.3390/biology12020304), 2023-02-14
Supplement: s1 [file s1]

**Table S1.** Chemical composition<sup>1</sup> of the free-range chickens' feed.

|                                   | <b>Starter</b><br><b>(1 – 17 days)</b> |               | <b>Grower</b><br><b>(18 – 35 days)</b> |               | <b>Finisher</b><br><b>(36 days - slaughter)</b> |               |
|-----------------------------------|----------------------------------------|---------------|----------------------------------------|---------------|-------------------------------------------------|---------------|
| <b>Metabolic Energy (kcal/kg)</b> | 3029.82                                |               | 3080.0                                 |               | 3080.0                                          |               |
| <b>Fibers (%)</b>                 | 2.54                                   |               | 2.46                                   |               | 2.46                                            |               |
| <b>Calcium (%)</b>                | 1.00                                   |               | 0.90                                   |               | 0.90                                            |               |
| <b>Phosphorus (%)</b>             | 0.68                                   |               | 0.63                                   |               | 0.63                                            |               |
| <b>Sodium (%)</b>                 | 0.18                                   |               | 0.17                                   |               | 0.17                                            |               |
| <b>Chloride (%)</b>               | 0.22                                   |               | 0.21                                   |               | 0.21                                            |               |
| <b>Potassium (%)</b>              | 0.91                                   |               | 0.84                                   |               | 0.84                                            |               |
| <b>Amino Acids</b>                | <b>Total</b>                           | <b>Digest</b> | <b>Total</b>                           | <b>Digest</b> | <b>Total</b>                                    | <b>Digest</b> |
| <b>Lysine (%)</b>                 | 1.42                                   | 1.30          | 1.20                                   | 1.09          | 1.20                                            | 1.09          |
| <b>Methionine (%)</b>             | 0.76                                   | 0.73          | 0.61                                   | 0.58          | 0.61                                            | 0.58          |
| <b>Methionine + Cysteine (%)</b>  | 1.13                                   | 1.03          | 0.95                                   | 0.85          | 0.95                                            | 0.85          |
| <b>Threonine (%)</b>              | 0.99                                   | 0.87          | 0.80                                   | 0.69          | 0.80                                            | 0.69          |
| <b>Cystine (%)</b>                | 0.34                                   |               | 0.32                                   |               | 0.32                                            |               |

<sup>1</sup>Chemical composition was noted according to feed formulation and NIR tests for verification
