# Supplementary material for: Levels of Circulating IgM and IgY Natural Antibodies in Broiler Chicks: Association with Genotype and Farming Systems
Source: MDPI journal article supplement (doi:10.3390/biology12020304), 2023-02-14
Supplement: s1 [file s1]

| MV: Multiple linear regression  |  |                      |                |                                     |                     |                    |          |                 |          |                |         |                     |         |         |                 |          |                |              |                     |                                     |                    |                 |          |                |    |                     |         |         |                 |          |                |        |                     |              |         |                                     |                 |  |  |        |    |  |  |  |  |  |        |    |  |              |                    |          |       |  |  |  |  |  |        |    |  |  |  |  |  |  |  |  |  |  |  |  |  |  |  |  |  |
|---------------------------------|--|----------------------|----------------|-------------------------------------|---------------------|--------------------|----------|-----------------|----------|----------------|---------|---------------------|---------|---------|-----------------|----------|----------------|--------------|---------------------|-------------------------------------|--------------------|-----------------|----------|----------------|----|---------------------|---------|---------|-----------------|----------|----------------|--------|---------------------|--------------|---------|-------------------------------------|-----------------|--|--|--------|----|--|--|--|--|--|--------|----|--|--------------|--------------------|----------|-------|--|--|--|--|--|--------|----|--|--|--|--|--|--|--|--|--|--|--|--|--|--|--|--|--|
| Dependent variable              |  | IgM anti-ACT         |                |                                     |                     |                    |          |                 |          |                |         |                     |         |         |                 |          |                | IgM anti-DNA |                     |                                     |                    |                 |          |                |    |                     |         |         |                 |          |                |        |                     | IgM anti-TNP |         |                                     |                 |  |  |        |    |  |  |  |  |  |        |    |  | IgM anti-LPS |                    |          |       |  |  |  |  |  |        |    |  |  |  |  |  |  |  |  |  |  |  |  |  |  |  |  |  |
| Regression type                 |  | Least squares        |                |                                     |                     |                    |          |                 |          |                |         |                     |         |         |                 |          |                |              |                     |                                     |                    |                 |          |                |    |                     |         |         |                 |          |                |        |                     |              |         |                                     |                 |  |  |        |    |  |  |  |  |  |        |    |  |              |                    |          |       |  |  |  |  |  |        |    |  |  |  |  |  |  |  |  |  |  |  |  |  |  |  |  |  |
| Analysis of Variance            |  | SS                   | DF             |                                     | MS                  | F (DFn, DFd)       | P value  |                 |          |                |         |                     |         |         |                 |          | SS             | DF           |                     | MS                                  | F (DFn, DFd)       | P value         |          |                |    |                     |         |         |                 |          |                | SS     | DF                  |              | MS      | F (DFn, DFd)                        | P value         |  |  |        |    |  |  |  |  |  |        |    |  |              |                    |          |       |  |  |  |  |  |        |    |  |  |  |  |  |  |  |  |  |  |  |  |  |  |  |  |  |
| Regression                      |  | 272185               | 12             |                                     | 22682               | F (12, 28) = 136.9 | P<0.0001 |                 |          |                |         |                     |         |         |                 |          | 271972         | 12           |                     | 22656                               | F (12, 28) = 128.1 | P<0.0001        |          |                |    |                     |         |         |                 |          |                | 271962 | 12                  |              | 22663   | F (12, 28) = 130.5                  | P<0.0001        |  |  |        |    |  |  |  |  |  | 272361 | 12 |  | 22772        | F (12, 28) = 178.9 | P<0.0001 |       |  |  |  |  |  |        |    |  |  |  |  |  |  |  |  |  |  |  |  |  |  |  |  |  |
| Residual                        |  | 4640                 | 28             |                                     | 165.7               |                    |          |                 |          |                |         |                     |         |         |                 |          |                | 4953         | 28                  |                                     | 176.9              |                 |          |                |    |                     |         |         |                 |          |                |        |                     | 4864         | 28      |                                     | 173.7           |  |  |        |    |  |  |  |  |  |        |    |  | 3565         | 28                 |          | 127.3 |  |  |  |  |  |        |    |  |  |  |  |  |  |  |  |  |  |  |  |  |  |  |  |  |
| Total                           |  | 276826               | 40             |                                     |                     |                    |          |                 |          |                |         |                     |         |         |                 |          |                |              |                     |                                     | 276826             | 40              |          |                |    |                     |         |         |                 |          |                |        |                     |              |         |                                     |                 |  |  | 276826 | 40 |  |  |  |  |  |        |    |  |              |                    |          |       |  |  |  |  |  | 276826 | 40 |  |  |  |  |  |  |  |  |  |  |  |  |  |  |  |  |  |
| Parameter estimates             |  | Estimate             | Standard error |                                     | 95% CI (asymptotic) | t                  | P value  | P value summary | Estimate | Standard error |         | 95% CI (asymptotic) | t       | P value | P value summary | Estimate | Standard error |              | 95% CI (asymptotic) | t                                   | P value            | P value summary | Estimate | Standard error |    | 95% CI (asymptotic) | t       | P value | P value summary | Estimate | Standard error |        | 95% CI (asymptotic) | t            | P value | P value summary                     |                 |  |  |        |    |  |  |  |  |  |        |    |  |              |                    |          |       |  |  |  |  |  |        |    |  |  |  |  |  |  |  |  |  |  |  |  |  |  |  |  |  |
| j0                              |  | Intercept            | 301.9          | 13.36                               | 274.6 to 329.3      | 22.61              | <0.0001  | ****            | 314.9    | 23.03          |         | 267.7 to 362.0      | 13.67   | <0.0001 | ****            | 296.7    | 18.11          |              | 259.6 to 333.8      | 16.38                               | <0.0001            | ****            | 280.7    | 10.54          |    | 259.1 to 302.3      | 26.64   | <0.0001 | ****            | 280.7    | 10.54          |        | 259.1 to 302.3      | 26.64        | <0.0001 | ****                                |                 |  |  |        |    |  |  |  |  |  |        |    |  |              |                    |          |       |  |  |  |  |  |        |    |  |  |  |  |  |  |  |  |  |  |  |  |  |  |  |  |  |
| j1                              |  | IgM ACT              | 7.008          | 15.46                               | -24.67 to 38.68     | 0.4532             | 0.6539   | ns              | -6.97    | 20.21          |         | -48.36 to 34.42     | 0.3449  | 0.7327  | ns              | 10.58    | 16.89          |              | -24.03 to 45.18     | 0.6261                              | 0.5363             | ns              | 29.07    | 9.745          |    | 8.103 to 49.03      | 2.982   | 0.0059  | **              | 29.07    | 9.745          |        | 8.103 to 49.03      | 2.982        | 0.0059  | **                                  |                 |  |  |        |    |  |  |  |  |  |        |    |  |              |                    |          |       |  |  |  |  |  |        |    |  |  |  |  |  |  |  |  |  |  |  |  |  |  |  |  |  |
| j2                              |  | Season[3]            | 16.05          | 13                                  | -11.58 to 41.68     | 1.158              | 0.2568   | ns              | 6.046    | 18.27          |         | -31.39 to 50.15     | 0.3309  | 0.7432  | ns              | 16.89    | 16.24          |              | -16.39 to 50.15     | 1.04                                | 0.3073             | ns              | 22.99    | 10.57          |    | 1.339 to 44.64      | 2.175   | 0.0382  | *               | 22.99    | 10.57          |        | 1.339 to 44.64      | 2.175        | 0.0382  | *                                   |                 |  |  |        |    |  |  |  |  |  |        |    |  |              |                    |          |       |  |  |  |  |  |        |    |  |  |  |  |  |  |  |  |  |  |  |  |  |  |  |  |  |
| j3                              |  | Season[1]            | 15.16          | 30.8                                | -47.84 to 78.25     | 0.492              | 0.6265   | ns              | 17.721   | 37.28          |         | -76.57 to 112.69    | 0.2861  | 0.7844  | ns              | -12.44   | 31.31          |              | -76.57 to 112.69    | 0.3973                              | 0.6941             | ns              | 10.45    | 20.91          |    | -20.91 to 44.55     | 0.491   | 0.6276  | ns              | 10.45    | 20.91          |        | -20.91 to 44.55     | 0.491        | 0.6276  | ns                                  |                 |  |  |        |    |  |  |  |  |  |        |    |  |              |                    |          |       |  |  |  |  |  |        |    |  |  |  |  |  |  |  |  |  |  |  |  |  |  |  |  |  |
| j4                              |  | Season[2]            | 12.28          | 19.97                               | -28.63 to 53.19     | 0.6149             | 0.5436   | ns              | 8.325    | 22.54          |         | -37.86 to 54.51     | 0.3693  | 0.7147  | ns              | 21.98    | 18             |              | -14.89 to 58.85     | 1.221                               | 0.2321             | ns              | 3.33     | 12.69          |    | 1.302 to 59.31      | 2.624   | 0.0139  | *               | 3.33     | 12.69          |        | 1.302 to 59.31      | 2.624        | 0.0139  | *                                   |                 |  |  |        |    |  |  |  |  |  |        |    |  |              |                    |          |       |  |  |  |  |  |        |    |  |  |  |  |  |  |  |  |  |  |  |  |  |  |  |  |  |
| j5                              |  | Breed[1]             | -184.6         | 15.15                               | -215.6 to -153.6    | 12.18              | <0.0001  | ****            | -181.3   | 21.06          |         | -224.4 to -138.1    | 8.607   | <0.0001 | ****            | -173.7   | 19.32          |              | -213.3 to -134.2    | 8.993                               | <0.0001            | ****            | -157.9   | 12.89          |    | -184.6 to -131.3    | 12.15   | <0.0001 | ****            | -157.9   | 12.89          |        | -184.6 to -131.3    | 12.15        | <0.0001 | ****                                |                 |  |  |        |    |  |  |  |  |  |        |    |  |              |                    |          |       |  |  |  |  |  |        |    |  |  |  |  |  |  |  |  |  |  |  |  |  |  |  |  |  |
| j6                              |  | IgM ACT - Season[3]  | -9.313         | 11.81                               | -33.50 to 14.87     | 0.7888             | 0.4369   | ns              | -1.165   | 14.42          |         | -28.38 to 30.71     | 0.08079 | 0.9362  | ns              | -9.193   | 13.18          |              | -36.19 to 17.81     | 0.6975                              | 0.4913             | ns              | -11.46   | 8.747          |    | -29.38 to 6.455     | 1.31    | 0.2007  | ns              | -11.46   | 8.747          |        | -29.38 to 6.455     | 1.31         | 0.2007  | ns                                  |                 |  |  |        |    |  |  |  |  |  |        |    |  |              |                    |          |       |  |  |  |  |  |        |    |  |  |  |  |  |  |  |  |  |  |  |  |  |  |  |  |  |
| j7                              |  | IgM ACT - Season[1]  | -8.011         | 18.72                               | -46.35 to 30.33     | 0.428              | 0.6719   | ns              | 7.212    | 18.72          |         | -31.51 to 45.95     | 0.3816  | 0.7057  | ns              | 6.381    | 18.65          |              | -31.51 to 45.95     | 0.3411                              | 0.7365             | ns              | -27.03   | 11.37          |    | -50.31 to -3.754    | 2.379   | 0.0244  | *               | -27.03   | 11.37          |        | -50.31 to -3.754    | 2.379        | 0.0244  | *                                   |                 |  |  |        |    |  |  |  |  |  |        |    |  |              |                    |          |       |  |  |  |  |  |        |    |  |  |  |  |  |  |  |  |  |  |  |  |  |  |  |  |  |
| j8                              |  | IgM ACT - Season[2]  | -5.784         | 17.17                               | -40.95 to 29.38     | 0.3369             | 0.7387   | ns              | 2.051    | 15.1           |         | -28.87 to 32.97     | 0.1358  | 0.8929  | ns              | -13.22   | 14.53          |              | -42.88 to 16.54     | 0.9097                              | 0.3707             | ns              | -27.03   | 11.37          |    | -50.31 to -3.754    | 2.379   | 0.0244  | *               | -27.03   | 11.37          |        | -50.31 to -3.754    | 2.379        | 0.0244  | *                                   |                 |  |  |        |    |  |  |  |  |  |        |    |  |              |                    |          |       |  |  |  |  |  |        |    |  |  |  |  |  |  |  |  |  |  |  |  |  |  |  |  |  |
| j9                              |  | IgM ACT - Breed[1]   | 9.091          | 12.87                               | -17.48 to 35.66     | 0.7009             | 0.4892   | ns              | 12.49    | 17.24          |         | -22.82 to 47.81     | 0.7247  | 0.4746  | ns              | 0.394    | 14.78          |              | -29.86 to 30.67     | 0.02666                             | 0.9789             | ns              | -17.7    | 8.443          |    | -37.46 to 2.051     | 1.836   | 0.077   | ns              | -17.7    | 8.443          |        | -37.46 to 2.051     | 1.836        | 0.077   | ns                                  |                 |  |  |        |    |  |  |  |  |  |        |    |  |              |                    |          |       |  |  |  |  |  |        |    |  |  |  |  |  |  |  |  |  |  |  |  |  |  |  |  |  |
| j10                             |  | Season[3] - Breed[1] | -1.035         | 14.05                               | -29.81 to 27.74     | 0.0737             | 0.9418   | ns              | -9.821   | 13.68          |         | -37.94 to 18.10     | 0.7254  | 0.4743  | ns              | -1.821   | 14.68          |              | -31.90 to 28.26     | 0.124                               | 0.9022             | ns              | -4.381   | 13.37          |    | -31.98 to 22.60     | 0.3427  | 0.7344  | ns              | -4.381   | 13.37          |        | -31.98 to 22.60     | 0.3427       | 0.7344  | ns                                  |                 |  |  |        |    |  |  |  |  |  |        |    |  |              |                    |          |       |  |  |  |  |  |        |    |  |  |  |  |  |  |  |  |  |  |  |  |  |  |  |  |  |
| j11                             |  | Season[1] - Breed[1] | 4.84           | 18.67                               | -33.41 to 43.09     | 0.2592             | 0.7974   | ns              | -7.894   | 21             |         | -50.90 to 35.12     | 0.3759  | 0.7098  | ns              | 6.694    | 19.6           |              | -33.45 to 46.84     | 0.3416                              | 0.7352             | ns              | 12.11    | 12.89          |    | -14.30 to 38.51     | 0.9394  | 0.3555  | ns              | 12.11    | 12.89          |        | -14.30 to 38.51     | 0.9394       | 0.3555  | ns                                  |                 |  |  |        |    |  |  |  |  |  |        |    |  |              |                    |          |       |  |  |  |  |  |        |    |  |  |  |  |  |  |  |  |  |  |  |  |  |  |  |  |  |
| j12                             |  | Season[2] - Breed[1] | -12.04         | 19.29                               | -51.56 to 27.48     | 0.6242             | 0.5375   | ns              | -20.05   | 15.91          |         | -52.65 to 12.54     | 1.26    | 0.218   | ns              | -3.241   | 15.4           |              | -34.79 to 28.31     | 0.2104                              | 0.8349             | ns              | 6.779    | 13.11          |    | -20.08 to 33.64     | 0.5169  | 0.6093  | ns              | 6.779    | 13.11          |        | -20.08 to 33.64     | 0.5169       | 0.6093  | ns                                  |                 |  |  |        |    |  |  |  |  |  |        |    |  |              |                    |          |       |  |  |  |  |  |        |    |  |  |  |  |  |  |  |  |  |  |  |  |  |  |  |  |  |
| Goodness of Fit                 |  |                      |                |                                     |                     |                    |          |                 |          |                |         |                     |         |         |                 |          |                |              |                     |                                     |                    |                 |          |                |    |                     |         |         |                 |          |                |        |                     |              |         |                                     |                 |  |  |        |    |  |  |  |  |  |        |    |  |              |                    |          |       |  |  |  |  |  |        |    |  |  |  |  |  |  |  |  |  |  |  |  |  |  |  |  |  |
| Degrees of Freedom              |  | 28                   |                |                                     |                     |                    |          |                 | 28       |                |         |                     |         |         |                 | 28       |                |              |                     |                                     |                    |                 | 28       |                |    |                     |         |         |                 |          |                |        |                     |              |         |                                     |                 |  |  |        |    |  |  |  |  |  |        |    |  |              |                    |          |       |  |  |  |  |  |        |    |  |  |  |  |  |  |  |  |  |  |  |  |  |  |  |  |  |
| R squared                       |  | 0.9832               |                |                                     |                     |                    |          |                 | 0.9821   |                |         |                     |         |         |                 | 0.9824   |                |              |                     |                                     |                    |                 | 0.9821   |                |    |                     |         |         |                 |          |                |        |                     |              |         |                                     |                 |  |  |        |    |  |  |  |  |  |        |    |  |              |                    |          |       |  |  |  |  |  |        |    |  |  |  |  |  |  |  |  |  |  |  |  |  |  |  |  |  |
| Multicollinearity               |  | Variable             | VIF            | R2 with other variables             |                     |                    |          |                 |          |                |         |                     |         |         |                 |          |                |              | VIF                 | R2 with other variables             |                    |                 |          |                |    |                     |         |         |                 |          |                |        |                     |              | VIF     | R2 with other variables             |                 |  |  |        |    |  |  |  |  |  |        |    |  |              |                    |          |       |  |  |  |  |  |        |    |  |  |  |  |  |  |  |  |  |  |  |  |  |  |  |  |  |
| j0                              |  | Intercept            |                |                                     |                     |                    |          |                 |          |                |         |                     |         |         |                 |          |                |              |                     |                                     |                    |                 |          |                |    |                     |         |         |                 |          |                |        |                     |              |         |                                     |                 |  |  |        |    |  |  |  |  |  |        |    |  |              |                    |          |       |  |  |  |  |  |        |    |  |  |  |  |  |  |  |  |  |  |  |  |  |  |  |  |  |
| j1                              |  | IgM ACT              | 18.11          | 0.9448                              |                     |                    |          |                 | 25.47    | 0.9607         |         |                     |         |         |                 | 18.28    | 0.9453         |              |                     |                                     |                    |                 |          |                |    |                     |         |         |                 |          |                |        |                     |              |         |                                     |                 |  |  |        |    |  |  |  |  |  |        |    |  |              |                    |          |       |  |  |  |  |  |        |    |  |  |  |  |  |  |  |  |  |  |  |  |  |  |  |  |  |
| j2                              |  | Season[3]            | 8.654          | 0.8844                              |                     |                    |          |                 | 16.02    | 0.9376         |         |                     |         |         |                 | 12.89    | 0.9224         |              |                     |                                     |                    |                 |          |                |    |                     |         |         |                 |          |                |        |                     |              |         |                                     |                 |  |  |        |    |  |  |  |  |  |        |    |  |              |                    |          |       |  |  |  |  |  |        |    |  |  |  |  |  |  |  |  |  |  |  |  |  |  |  |  |  |
| j3                              |  | Season[1]            | 29.33          | 0.9659                              |                     |                    |          |                 | 40.25    | 0.9752         |         |                     |         |         |                 | 28.9     | 0.9654         |              |                     |                                     |                    |                 |          |                |    |                     |         |         |                 |          |                |        |                     |              |         |                                     |                 |  |  |        |    |  |  |  |  |  |        |    |  |              |                    |          |       |  |  |  |  |  |        |    |  |  |  |  |  |  |  |  |  |  |  |  |  |  |  |  |  |
| j4                              |  | Season[2]            | 19.37          | 0.9484                              |                     |                    |          |                 | 23.12    | 0.9568         |         |                     |         |         |                 | 19.12    | 0.9534         |              |                     |                                     |                    |                 |          |                |    |                     |         |         |                 |          |                |        |                     |              |         |                                     |                 |  |  |        |    |  |  |  |  |  |        |    |  |              |                    |          |       |  |  |  |  |  |        |    |  |  |  |  |  |  |  |  |  |  |  |  |  |  |  |  |  |
| j5                              |  | Breed[1]             | 12.77          | 0.9217                              |                     |                    |          |                 | 23.11    | 0.9567         |         |                     |         |         |                 | 19.81    | 0.9495         |              |                     |                                     |                    |                 |          |                |    |                     |         |         |                 |          |                |        |                     |              |         |                                     |                 |  |  |        |    |  |  |  |  |  |        |    |  |              |                    |          |       |  |  |  |  |  |        |    |  |  |  |  |  |  |  |  |  |  |  |  |  |  |  |  |  |
| j6                              |  | IgM ACT - Season[3]  | 14.9           | 0.9329                              |                     |                    |          |                 | 25.6     | 0.9609         |         |                     |         |         |                 | 21.98    | 0.9545         |              |                     |                                     |                    |                 |          |                |    |                     |         |         |                 |          |                |        |                     |              |         |                                     |                 |  |  |        |    |  |  |  |  |  |        |    |  |              |                    |          |       |  |  |  |  |  |        |    |  |  |  |  |  |  |  |  |  |  |  |  |  |  |  |  |  |
| j7                              |  | IgM ACT - Season[1]  | 26.26          | 0.9619                              |                     |                    |          |                 | 37.84    | 0.9736         |         |                     |         |         |                 | 36.6     | 0.9727         |              |                     |                                     |                    |                 |          |                |    |                     |         |         |                 |          |                |        |                     |              |         |                                     |                 |  |  |        |    |  |  |  |  |  |        |    |  |              |                    |          |       |  |  |  |  |  |        |    |  |  |  |  |  |  |  |  |  |  |  |  |  |  |  |  |  |
| j8                              |  | IgM ACT - Season[2]  | 49.12          | 0.9778                              |                     |                    |          |                 | 39.87    | 0.9749         |         |                     |         |         |                 | 26.27    | 0.9619         |              |                     |                                     |                    |                 |          |                |    |                     |         |         |                 |          |                |        |                     |              |         |                                     |                 |  |  |        |    |  |  |  |  |  |        |    |  |              |                    |          |       |  |  |  |  |  |        |    |  |  |  |  |  |  |  |  |  |  |  |  |  |  |  |  |  |
| j9                              |  | IgM ACT - Breed[1]   | 31.12          | 0.9679                              |                     |                    |          |                 | 59.47    | 0.9832         |         |                     |         |         |                 | 42.51    | 0.9765         |              |                     |                                     |                    |                 |          |                |    |                     |         |         |                 |          |                |        |                     |              |         |                                     |                 |  |  |        |    |  |  |  |  |  |        |    |  |              |                    |          |       |  |  |  |  |  |        |    |  |  |  |  |  |  |  |  |  |  |  |  |  |  |  |  |  |
| j10                             |  | Season[3] - Breed[1] | 7.867          | 0.8696                              |                     |                    |          |                 | 8.808    | 0.8531         |         |                     |         |         |                 | 7.991    | 0.8749         |              |                     |                                     |                    |                 |          |                |    |                     |         |         |                 |          |                |        |                     |              |         |                                     |                 |  |  |        |    |  |  |  |  |  |        |    |  |              |                    |          |       |  |  |  |  |  |        |    |  |  |  |  |  |  |  |  |  |  |  |  |  |  |  |  |  |
| j11                             |  | Season[1] - Breed[1] | 7.596          | 0.8883                              |                     |                    |          |                 | 8.996    | 0.8888         |         |                     |         |         |                 | 7.981    | 0.8747         |              |                     |                                     |                    |                 |          |                |    |                     |         |         |                 |          |                |        |                     |              |         |                                     |                 |  |  |        |    |  |  |  |  |  |        |    |  |              |                    |          |       |  |  |  |  |  |        |    |  |  |  |  |  |  |  |  |  |  |  |  |  |  |  |  |  |
| j12                             |  | Season[2] - Breed[1] | 13.04          | 0.9233                              |                     |                    |          |                 | 8.308    | 0.8796         |         |                     |         |         |                 | 7.927    | 0.8739         |              |                     |                                     |                    |                 |          |                |    |                     |         |         |                 |          |                |        |                     |              |         |                                     |                 |  |  |        |    |  |  |  |  |  |        |    |  |              |                    |          |       |  |  |  |  |  |        |    |  |  |  |  |  |  |  |  |  |  |  |  |  |  |  |  |  |
| Normality of Residuals          |  | Statistics           | P value        | Passed normality test (alpha=0.05)? | P value summary     |                    |          |                 |          |                |         |                     |         |         |                 |          |                | Statistics   | P value             | Passed normality test (alpha=0.05)? | P value summary    |                 |          |                |    |                     |         |         |                 |          |                |        |                     | Statistics   | P value | Passed normality test (alpha=0.05)? | P value summary |  |  |        |    |  |  |  |  |  |        |    |  |              |                    |          |       |  |  |  |  |  |        |    |  |  |  |  |  |  |  |  |  |  |  |  |  |  |  |  |  |
| Anderson-Darling (A2*)          |  | 0.1794               | 0.9111         | Yes                                 | ns                  | 0.1749             | 0.8436   | Yes             | ns       | 0.1798         | 0.9106  | Yes                 | ns      | 0.1798  | 0.9106          | Yes      | ns             | 0.1798       | 0.9106              | Yes                                 | ns                 | 0.3269          | 0.5096   | Yes            | ns | 0.3269              | 0.5096  | Yes     | ns              | 0.3269   | 0.5096         | Yes    | ns                  | 0.3269       | 0.5096  | Yes                                 | ns              |  |  |        |    |  |  |  |  |  |        |    |  |              |                    |          |       |  |  |  |  |  |        |    |  |  |  |  |  |  |  |  |  |  |  |  |  |  |  |  |  |
| D'Agostino-Pearson omnibus (K2) |  | 0.0179               | 0.853          | Yes                                 | ns                  | 0.0159             | 0.8539   | Yes             | ns       | 0.0599         | 0.9705  | Yes                 | ns      | 0.0599  | 0.9705          | Yes      | ns             | 0.0599       | 0.9705              | Yes                                 | ns                 | 3.213           | 0.2006   | Yes            | ns | 3.213               | 0.2006  | Yes     | ns              | 3.213    | 0.2006         | Yes    | ns                  | 3.213        | 0.2006  | Yes                                 | ns              |  |  |        |    |  |  |  |  |  |        |    |  |              |                    |          |       |  |  |  |  |  |        |    |  |  |  |  |  |  |  |  |  |  |  |  |  |  |  |  |  |
| Shapiro-Wilk (W)                |  | 0.9829               | 0.7847         | Yes                                 | ns                  | 0.9843             | 0.834    | Yes             | ns       | 0.9901         | 0.9739  | Yes                 | ns      | 0.9901  | 0.9739          | Yes      | ns             | 0.9901       | 0.9739              | Yes                                 | ns                 | 0.9786          | 0.621    | Yes            | ns | 0.9786              | 0.621   | Yes     | ns              | 0.9786   | 0.621          | Yes    | ns                  | 0.9786       | 0.621   | Yes                                 | ns              |  |  |        |    |  |  |  |  |  |        |    |  |              |                    |          |       |  |  |  |  |  |        |    |  |  |  |  |  |  |  |  |  |  |  |  |  |  |  |  |  |
| Kolmogorov-Smirnov (distance)   |  | 0.05836              | >0.1000        | Yes                                 | ns                  | 0.08846            | >0.1000  | Yes             | ns       | 0.07953        | >0.1000 | Yes                 | ns      | 0.07953 | >0.1000         | Yes      | ns             | 0.07953      | >0.1000             | Yes                                 | ns                 | 0.08465         | >0.1000  | Yes            | ns | 0.08465             | >0.1000 | Yes     | ns              | 0.08465  | >0.1000        | Yes    | ns                  | 0.08465      | >0.1000 | Yes                                 | ns              |  |  |        |    |  |  |  |  |  |        |    |  |              |                    |          |       |  |  |  |  |  |        |    |  |  |  |  |  |  |  |  |  |  |  |  |  |  |  |  |  |
| Rows in table                   |  | 45                   |                |                                     |                     | 45                 |          |                 | 45       |                |         | 45                  |         | 45      |                 | 45       |                | 45           |                     | 45                                  |                    | 45              |          | 45             |    | 45                  |         | 45      |                 | 45       |                | 45     |                     | 45           |         |                                     |                 |  |  |        |    |  |  |  |  |  |        |    |  |              |                    |          |       |  |  |  |  |  |        |    |  |  |  |  |  |  |  |  |  |  |  |  |  |  |  |  |  |
| Rows skipped (missing data)     |  | 4                    |                |                                     |                     | 4                  |          |                 | 4        |                |         | 4                   |         | 4       |                 | 4        |                | 4            |                     | 4                                   |                    | 4               |          | 4              |    | 4                   |         | 4       |                 | 4        |                | 4      |                     | 4            |         |                                     |                 |  |  |        |    |  |  |  |  |  |        |    |  |              |                    |          |       |  |  |  |  |  |        |    |  |  |  |  |  |  |  |  |  |  |  |  |  |  |  |  |  |
| Rows analyzed (if cases)        |  | 41                   |                |                                     |                     | 41                 |          |                 | 41       |                |         | 41                  |         | 41      |                 | 41       |                | 41           |                     | 41                                  |                    | 41              |          | 41             |    | 41                  |         | 41      |                 | 41       |                | 41     |                     | 41           |         |                                     |                 |  |  |        |    |  |  |  |  |  |        |    |  |              |                    |          |       |  |  |  |  |  |        |    |  |  |  |  |  |  |  |  |  |  |  |  |  |  |  |  |  |
| Number of parameter estimates   |  | 13                   |                |                                     |                     | 13                 |          |                 | 13       |                |         | 13                  |         | 13      |                 | 13       |                | 13           |                     | 13                                  |                    | 13              |          | 13             |    | 13                  |         | 13      |                 | 13       |                | 13     |                     | 13           |         |                                     |                 |  |  |        |    |  |  |  |  |  |        |    |  |              |                    |          |       |  |  |  |  |  |        |    |  |  |  |  |  |  |  |  |  |  |  |  |  |  |  |  |  |
| #cases/#parameters              |  | 3.2                  |                |                                     |                     | 3.2                |          |                 | 3.2      |                |         | 3.2                 |         | 3.2     |                 | 3.2      |                | 3.2          |                     | 3.2                                 |                    | 3.2             |          | 3.2            |    | 3.2                 |         | 3.2     |                 | 3.2      |                | 3.2    |                     | 3.2          |         |                                     |                 |  |  |        |    |  |  |  |  |  |        |    |  |              |                    |          |       |  |  |  |  |  |        |    |  |  |  |  |  |  |  |  |  |  |  |  |  |  |  |  |  |

| MV: Multiple linear regression  |  |                      |          |                                     |                     |            |         |                 |          |                    |                     |        |         |                 |                    |                |                     |        |         |                    |          |         |     |    |
|---------------------------------|--|----------------------|----------|-------------------------------------|---------------------|------------|---------|-----------------|----------|--------------------|---------------------|--------|---------|-----------------|--------------------|----------------|---------------------|--------|---------|--------------------|----------|---------|-----|----|
| Dependent variable              |  | EPEF                 |          |                                     |                     |            |         |                 |          |                    |                     |        |         |                 |                    |                |                     |        |         |                    |          |         |     |    |
| Regression type                 |  | Least squares        |          |                                     |                     |            |         |                 |          |                    |                     |        |         |                 |                    |                |                     |        |         |                    |          |         |     |    |
| Analysis of Variance            |  | SS                   | DF       | MS                                  | F (DFn, DFd)        | P value    |         |                 |          |                    |                     |        |         |                 |                    |                |                     |        |         |                    |          |         |     |    |
| Regression                      |  | 272859               | 12       | 22738                               | F (12, 28) = 160.5  | P<0.0001   | 272777  | 12              | 22731    | F (12, 28) = 157.2 | P<0.0001            | 273149 | 12      | 22762           | F (12, 28) = 173.3 | P<0.0001       | 273145              | 12     | 22762   | F (12, 28) = 173.1 | P<0.0001 |         |     |    |
| Residual                        |  | 2867                 | 28       | 102.4                               |                     |            |         |                 |          |                    |                     |        |         |                 |                    |                |                     |        |         |                    |          |         |     |    |
| Total                           |  | 276826               | 40       |                                     |                     |            |         |                 |          |                    |                     |        |         |                 |                    |                |                     |        |         |                    |          |         |     |    |
| Parameter estimates             |  | Variable             | Estimate | Standard error                      | 95% CI (asymptotic) | t          | P value | P value summary | Estimate | Standard error     | 95% CI (asymptotic) | t      | P value | P value summary | Estimate           | Standard error | 95% CI (asymptotic) | t      | P value | P value summary    |          |         |     |    |
| j0                              |  | Intercept            | 269      | 14.51                               | 239.3 to 298.7      | 18.53      | <0.0001 | ****            | 247.4    | 26.26              | 193.7 to 301.2      | 9.423  | <0.0001 | ****            | 275.4              | 11.39          | 252.1 to 298.8      | 24.17  | <0.0001 | ****               |          |         |     |    |
| j1                              |  | IgY ACT              | 26.21    | 9.069                               | 7.633 to 44.79      | 2.89       | 0.0074  | **              | 40.58    | 17.35              | 5.049 to 76.12      | 2.339  | 0.0297  | *               | 36.23              | 11.22          | 13.25 to 59.21      | 3.23   | 0.0032  | **                 |          |         |     |    |
| j2                              |  | Season[3]            | 35.2     | 17.05                               | 0.2767 to 70.12     | 2.065      | 0.0483  | *               | 50.83    | 27.52              | -5.543 to 107.2     | 1.847  | 0.0793  | ns              | 33.38              | 13.65          | 5.423 to 61.34      | 2.446  | 0.021   | *                  |          |         |     |    |
| j3                              |  | Season[1]            | 47.84    | 20.31                               | 6.235 to 89.45      | 2.365      | 0.0267  | *               | 25.67    | 57.04              | -142.4 to 91.27     | 0.4483 | 0.6574  | ns              | 13.37              | 23.09          | -33.92 to 60.66     | 0.5782 | 0.5671  | ns                 |          |         |     |    |
| j4                              |  | Season[2]            | 33.66    | 17.02                               | -1.211 to 68.53     | 1.977      | 0.0579  | ns              | 32.04    | 29.91              | -29.23 to 93.31     | 1.071  | 0.2933  | ns              | 12.75              | 16.67          | -21.40 to 48.90     | 0.7647 | 0.4509  | ns                 |          |         |     |    |
| j5                              |  | Breed[1]             | -151.6   | 14.86                               | -182.0 to -121.2    | 10.2       | <0.0001 | ****            | -118.7   | 24.5               | -168.9 to -68.54    | 4.846  | <0.0001 | ****            | -142.8             | 11.89          | -167.2 to -118.5    | 12.01  | <0.0001 | ****               |          |         |     |    |
| j6                              |  | IgY ACT - Season[3]  | -16.78   | 11.69                               | -40.72 to 7.152     | 1.436      | 0.162   | ns              | -26.87   | 19.9               | -67.63 to 13.90     | 1.35   | 0.1878  | ns              | -28.89             | 11.94          | -54.36 to -3.434    | 2.503  | 0.0184  | *                  |          |         |     |    |
| j7                              |  | IgY ACT - Season[1]  | -27.05   | 11.48                               | -50.56 to -3.545    | 2.367      | 0.0266  | *               | 1.348    | 28.86              | -54.13 to 60.82     | 0.1193 | 0.9059  | ns              | -17.43             | 16.55          | -51.34 to 16.48     | 1.053  | 0.3015  | ns                 |          |         |     |    |
| j8                              |  | IgY ACT - Season[2]  | -16.99   | 10.29                               | -38.06 to 4.081     | 1.652      | 0.1098  | ns              | -19.39   | 18.37              | -57.01 to 18.24     | 1.056  | 0.3002  | ns              | -10.16             | 14.56          | -39.99 to 19.68     | 0.6973 | 0.4914  | ns                 |          |         |     |    |
| j9                              |  | IgY ACT - Breed[1]   | -10.52   | 8.665                               | -28.27 to 7.234     | 1.214      | 0.235   | ns              | -27.09   | 10.51              | -48.62 to -5.554    | 1.411  | 0.1691  | ns              | -27.09             | 10.51          | -48.62 to -5.554    | 2.577  | 0.0158  | *                  |          |         |     |    |
| j10                             |  | Season[3] - Breed[1] | -10.21   | 10.74                               | -32.20 to 11.79     | 0.9607     | 0.3409  | ns              | -14.26   | 10.21              | -36.78 to 9.2612    | 1.406  | 0.1652  | ns              | -14.26             | 10.21          | -36.78 to 9.2612    | 0.4259 | 0.6705  | ns                 |          |         |     |    |
| j11                             |  | Season[1] - Breed[1] | -1.615   | 12.98                               | -28.20 to 24.97     | 0.1245     | 0.9018  | ns              | -25.23   | 32.08              | -40.49 to 90.95     | 0.7864 | 0.4382  | ns              | -10.58             | 14.33          | -38.78 to 36.94     | 0.7381 | 0.4669  | ns                 |          |         |     |    |
| j12                             |  | Season[2] - Breed[1] | -11.25   | 10.55                               | -32.87 to 10.36     | 1.067      | 0.2953  | ns              | -20.71   | 15.13              | -51.89 to 10.27     | 1.369  | 0.1818  | ns              | -6.589             | 10.21          | -27.49 to 14.31     | 0.6457 | 0.5238  | ns                 |          |         |     |    |
| Goodness of Fit                 |  |                      |          |                                     |                     |            |         |                 |          |                    |                     |        |         |                 |                    |                |                     |        |         |                    |          |         |     |    |
| Degrees of Freedom              |  | 28                   |          |                                     |                     |            |         |                 |          |                    |                     |        |         |                 |                    |                |                     |        |         |                    |          |         |     |    |
| R squared                       |  | 0.9857               |          |                                     |                     |            |         |                 |          |                    |                     |        |         |                 |                    |                |                     |        |         |                    |          |         |     |    |
| Multicollinearity               |  | Variable             | VIF      | R2 with other variables             |                     |            |         |                 |          |                    |                     |        |         |                 |                    |                |                     |        |         |                    |          |         |     |    |
| j0                              |  | Intercept            |          |                                     |                     |            |         |                 |          |                    |                     |        |         |                 |                    |                |                     |        |         |                    |          |         |     |    |
| j1                              |  | IgY ACT              | 5.747    | 0.826                               |                     |            |         |                 |          |                    |                     |        |         |                 |                    |                |                     |        |         |                    |          |         |     |    |
| j2                              |  | Season[3]            | 17.41    | 0.9426                              |                     |            |         |                 |          |                    |                     |        |         |                 |                    |                |                     |        |         |                    |          |         |     |    |
| j3                              |  | Season[1]            | 14.91    | 0.933                               |                     |            |         |                 |          |                    |                     |        |         |                 |                    |                |                     |        |         |                    |          |         |     |    |
| j4                              |  | Season[2]            | 16.46    | 0.9392                              |                     |            |         |                 |          |                    |                     |        |         |                 |                    |                |                     |        |         |                    |          |         |     |    |
| j5                              |  | Breed[1]             | 14.37    | 0.9324                              |                     |            |         |                 |          |                    |                     |        |         |                 |                    |                |                     |        |         |                    |          |         |     |    |
| j6                              |  | IgY ACT - Season[3]  | 49.05    | 0.928                               |                     |            |         |                 |          |                    |                     |        |         |                 |                    |                |                     |        |         |                    |          |         |     |    |
| j7                              |  | IgY ACT - Season[1]  | 63.76    | 0.9073                              |                     |            |         |                 |          |                    |                     |        |         |                 |                    |                |                     |        |         |                    |          |         |     |    |
| j8                              |  | IgY ACT - Season[2]  | 16.16    | 0.9381                              |                     |            |         |                 |          |                    |                     |        |         |                 |                    |                |                     |        |         |                    |          |         |     |    |
| j9                              |  | IgY ACT - Breed[1]   | 13.5     | 0.9259                              |                     |            |         |                 |          |                    |                     |        |         |                 |                    |                |                     |        |         |                    |          |         |     |    |
| j10                             |  | Season[3] - Breed[1] | 5.244    | 0.8953                              |                     |            |         |                 |          |                    |                     |        |         |                 |                    |                |                     |        |         |                    |          |         |     |    |
| j11                             |  | Season[1] - Breed[1] | 4.292    | 0.767                               |                     |            |         |                 |          |                    |                     |        |         |                 |                    |                |                     |        |         |                    |          |         |     |    |
| j12                             |  | Season[2] - Breed[1] | 4.561    | 0.7807                              |                     |            |         |                 |          |                    |                     |        |         |                 |                    |                |                     |        |         |                    |          |         |     |    |
| Normality of Residuals          |  | Statistics           | P value  | Passed normality test (alpha=0.05)? |                     |            |         |                 |          |                    |                     |        |         |                 |                    |                |                     |        |         |                    |          |         |     |    |
| Anderson-Darling (A2*)          |  | 2.2539               | 0.7153   | Yes                                 | ns                  | Statistics |         |                 |          |                    |                     |        |         |                 |                    |                |                     |        |         |                    | 0.4252   | 0.2523  | Yes | ns |
| D'Agostino-Pearson omnibus (K2) |  | 0.9589               | 0.7726   | Yes                                 | ns                  | Statistics |         |                 |          |                    |                     |        |         |                 |                    |                |                     |        |         |                    | 0.8392   | 0.6573  | Yes | ns |
| Shapiro-Wilk (W)                |  | 0.9164               | 0.8971   | Yes                                 | ns                  | Statistics |         |                 |          |                    |                     |        |         |                 |                    |                |                     |        |         |                    | 0.9822   | 0.7575  | Yes | ns |
| Kolmogorov-Smirnov (distance)   |  | 0.1093               | >0.1000  | Yes                                 | ns                  | Statistics |         |                 |          |                    |                     |        |         |                 |                    |                |                     |        |         |                    | 0.07879  | >0.1000 | Yes | ns |
| Rows in table                   |  | 45                   |          |                                     |                     |            |         |                 |          |                    |                     |        |         |                 |                    |                |                     |        |         |                    |          |         |     |    |
| Rows skipped (missing data)     |  | 4                    |          |                                     |                     |            |         |                 |          |                    |                     |        |         |                 |                    |                |                     |        |         |                    |          |         |     |    |
| Rows analyzed (if cases)        |  | 41                   |          |                                     |                     |            |         |                 |          |                    |                     |        |         |                 |                    |                |                     |        |         |                    |          |         |     |    |
| Number of parameter estimates   |  | 13                   |          |                                     |                     |            |         |                 |          |                    |                     |        |         |                 |                    |                |                     |        |         |                    |          |         |     |    |
| #cases/parameters               |  | 3.2                  |          |                                     |                     |            |         |                 |          |                    |                     |        |         |                 |                    |                |                     |        |         |                    |          |         |     |    |
